# Supplementary material
Source: PubMed Central journal article supplement (PMC4915392)
Supplement: NIHMS722573-supplement.pdf [file NIHMS722573-supplement.pdf]

## Dissecting AI-2-mediated quorum sensing through C5-analogue synthesis and biochemical analysis

Karen C. Collins, Kyoji Tsuchikama, Colin A. Lowery, Jie Zhu, Kim D. Janda\*

Departments of Chemistry and Immunology, The Skaggs Institute for Chemical Biology, Worm Institute of Research and Medicine (WIRM), The Scripps Research Institute, 10550 North Torrey Pines Road, La Jolla, California 92037, United States.

### Calculation of Equilibrium Constants

Equilibrium constants of hydration were calculated using the method of Casado (Figure S1).<sup>1</sup> Under standard conditions (298.15 K, 1 atm), the equilibrium constant for **(2S,4S)-SH-DPD** was calculated to be 8.31, comparable to those of (2R,4S)-DHMF and (2S,4S)-DHMF, which were calculated to be 12.34 and 4.60, respectively. These values suggest that under aqueous conditions, the cyclised form of **C5-SH-DPD** has comparable hydration to that of DPD. Furthermore, the validity of these calculations are supported by the 4.3:1 hydrate/ketone ratio observed for DPD by <sup>1</sup>H-NMR spectroscopy.<sup>2</sup>

|                        | G (ketone)/a.u. | G (hydrate)/a.u. | $\Delta G_{exchange}/a.u.$ | $\log K_{hyd}$ |
|------------------------|-----------------|------------------|----------------------------|----------------|
| acetone                | -193.1310337    | -269.5474811     | -                          | -              |
| <b>(2S, 4S)-SH-DPD</b> | -819.1470804    | -895.5717334     | -0.008205719               | 0.92           |
| <b>(2R, 4S)-DHMF</b>   | -496.1726171    | -572.5976328     | -0.008563396               | 1.09           |
| <b>(2S, 4S)-DHMF</b>   | -496.1718362    | -572.5959201     | -0.007636544               | 0.66           |

$$\log(K_{hyd}) = \log[K(\text{acetone})_{hyd,exp}] - \frac{\Delta G_{exchange}}{\ln(10RT)}$$

**Figure S1.** Calculations of the Equilibrium Constants of Hydration

DFT calculations were performed using the B3LYP/6-31++(d,p) level of theory and the PCM solvation model (solvent: water) in the Gaussian 09 package. The obtained values were corrected by applying a scaling factor of 0.95.  $\log[K(\text{acetone})_{hyd,exp}]$  = experimentally determined equilibrium constant of hydration of acetone  $(-2.85)^3$ , R = gas constant  $(8.3145 \text{ J K}^{-1} \text{ mol}^{-1})$ , T = temperature (298.15 K)

### Numerical Bacterial Assay Data

|                                     | C5-SH-DPD         | C5-Cl-DPD        | C5-F-DPD         | C5-OMe-DPD       | DPD           | DMSO            |
|-------------------------------------|-------------------|------------------|------------------|------------------|---------------|-----------------|
| <b>50 <math>\mu\text{M}</math></b>  | $-1.50 \pm 1.93$  | $0.573 \pm 1.41$ | $-2.05 \pm 1.05$ | $-2.49 \pm 7.91$ | $100 \pm 4.0$ | $0.00 \pm 1.07$ |
| <b>200 <math>\mu\text{M}</math></b> | $-0.688 \pm 2.73$ | $4.22 \pm 2.01$  | $-3.19 \pm 1.06$ | $-5.60 \pm 4.09$ |               |                 |

|                                     | C5-SH-DPD       | C5-Cl-DPD       | C5-F-DPD      | C5-OMe-DPD      | DPD           | Pr-DPD (25 $\mu\text{M}$ ) | DMSO            |
|-------------------------------------|-----------------|-----------------|---------------|-----------------|---------------|----------------------------|-----------------|
| <b>50 <math>\mu\text{M}</math></b>  | $106 \pm 1.1$   | $98.8 \pm 5.18$ | $124 \pm 2.7$ | $89.3 \pm 5.97$ | $100 \pm 1.9$ | $2.03 \pm 0.30$            | $0.00 \pm 0.93$ |
| <b>200 <math>\mu\text{M}</math></b> | $94.3 \pm 3.00$ | $103 \pm 11.6$  | $128 \pm 4.3$ | $92.2 \pm 3.79$ |               |                            |                 |

**Table S1 and S2.** Agonism and antagonism of C5-DPD analogues in *V. harveyi* and *S. Typhimurium*.

In the case of agonism, all contain 50  $\mu\text{M}$  DPD; Pr-DPD used as a positive antagonism control.  $\beta$ -Galactosidase activity in was normalised to cell density. All data was performed in triplicate, errors represent SEM.

# NMR Spectra

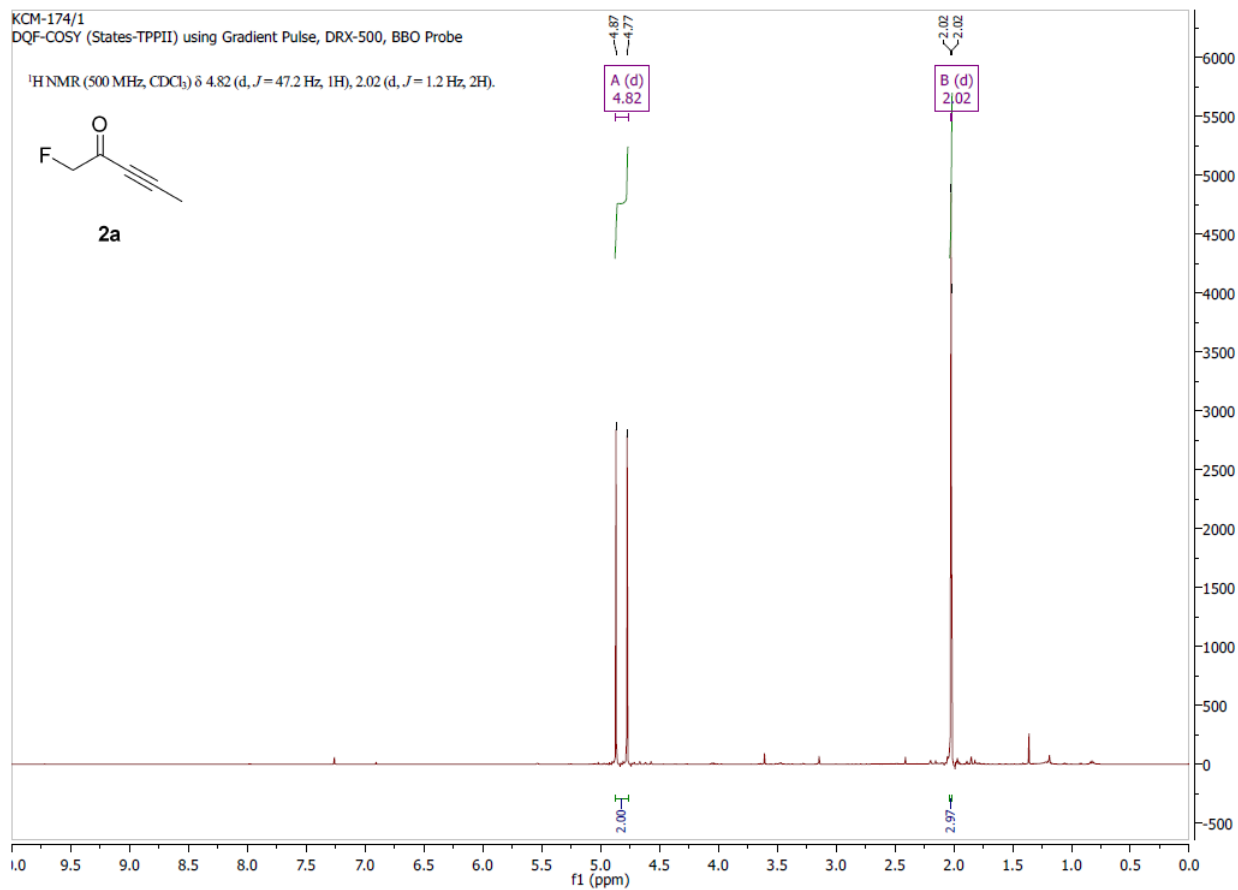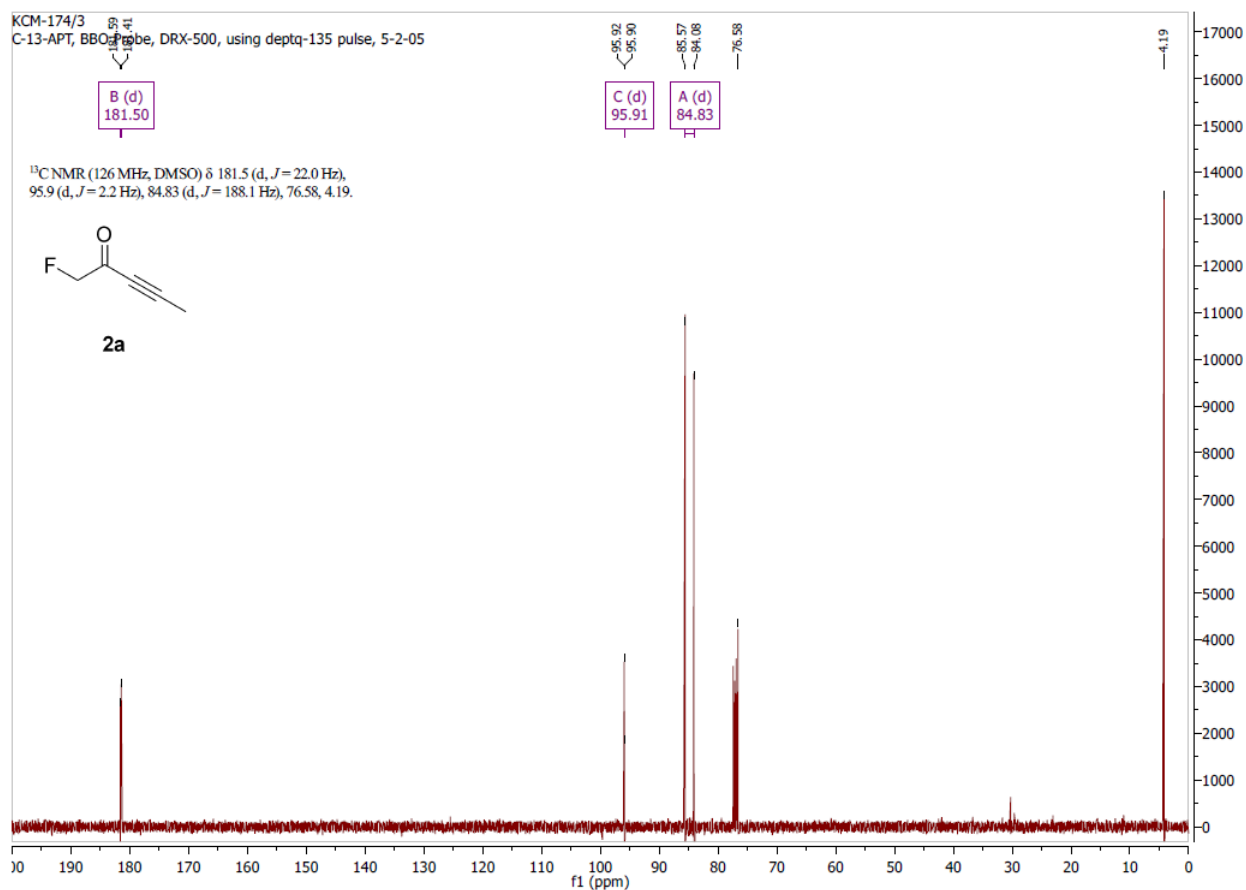

KCM-211/3  
F-19/CDCl<sub>3</sub>, Ref with CCl<sub>3</sub>F

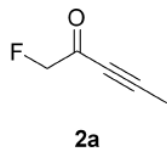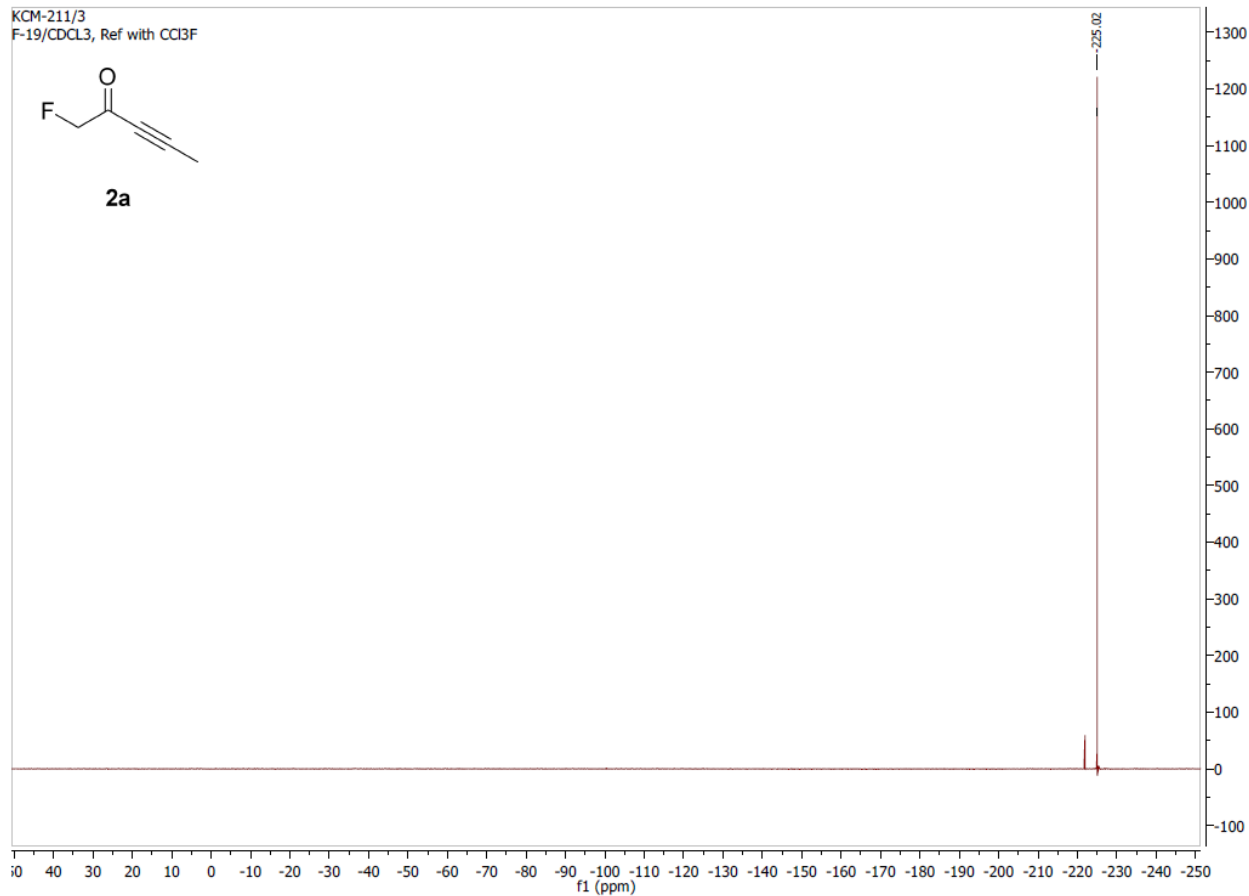

KCM-084-1a\_01  
Std proton

<sup>1</sup>H NMR (400 MHz, cdcl<sub>3</sub>) δ 4.17 (s, 2H), 2.05 (s, 3H).

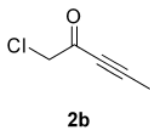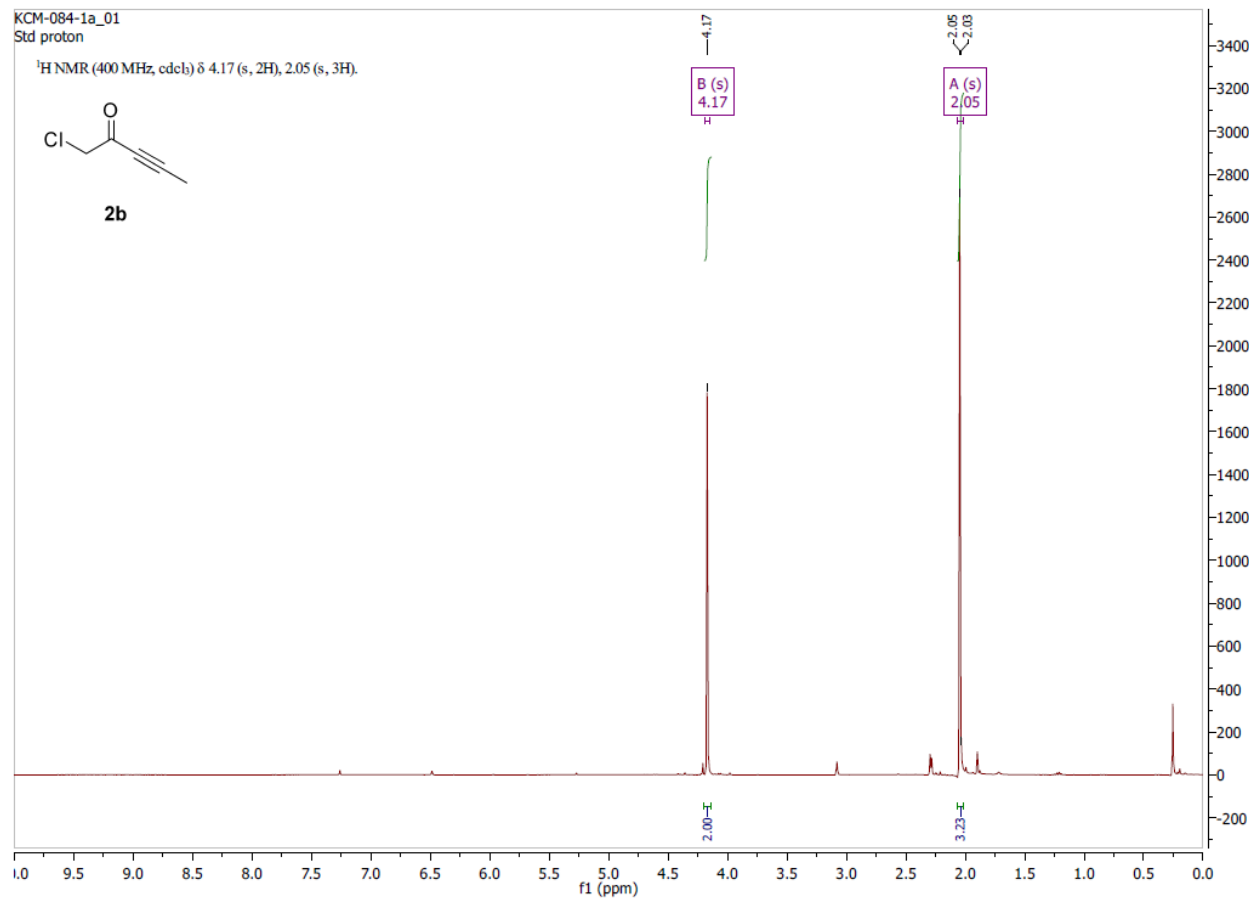

KCM-084-1a\_13C/8  
C-13 Routine 1D experiment. BBO Probe, 9-13-2007

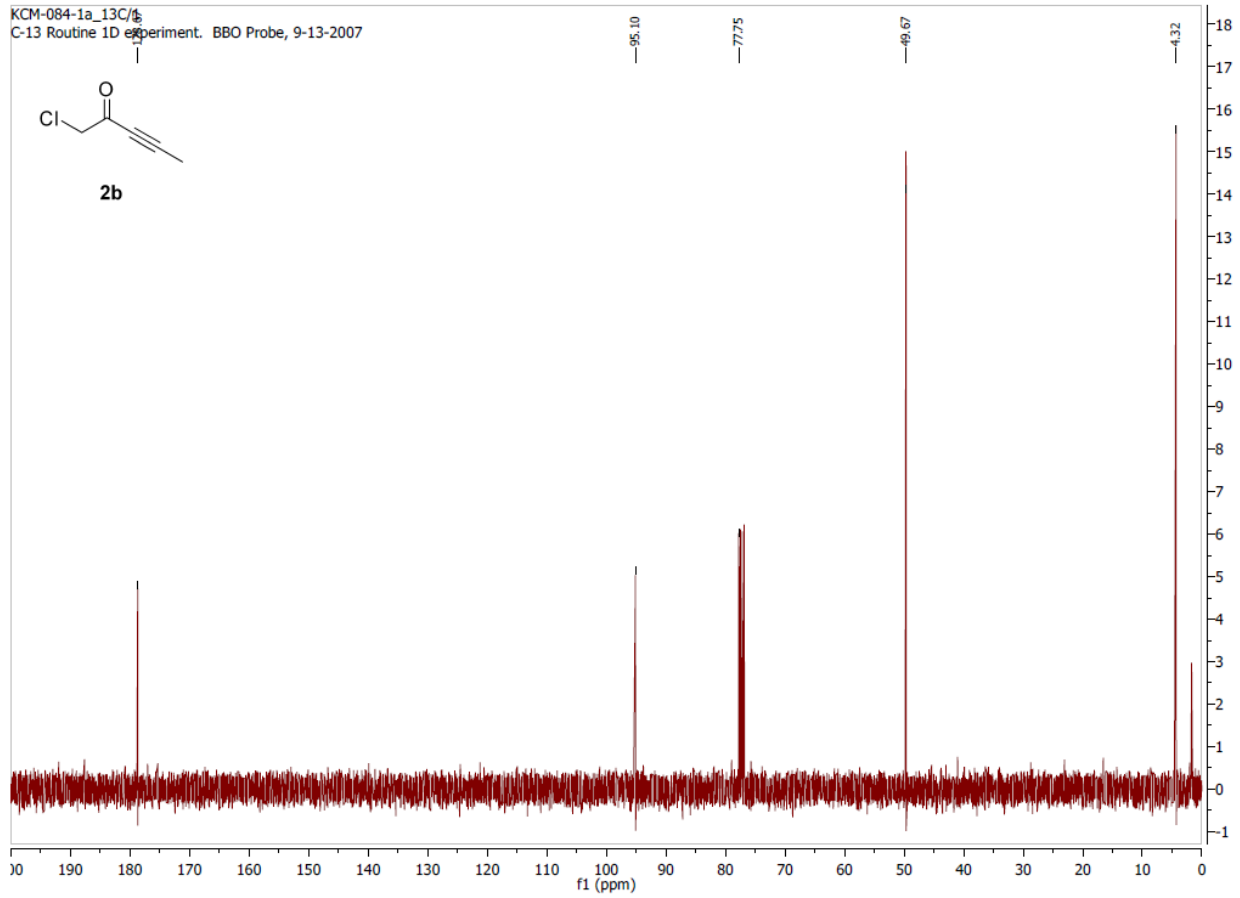

KCM-179-1a\_01  
Std proton

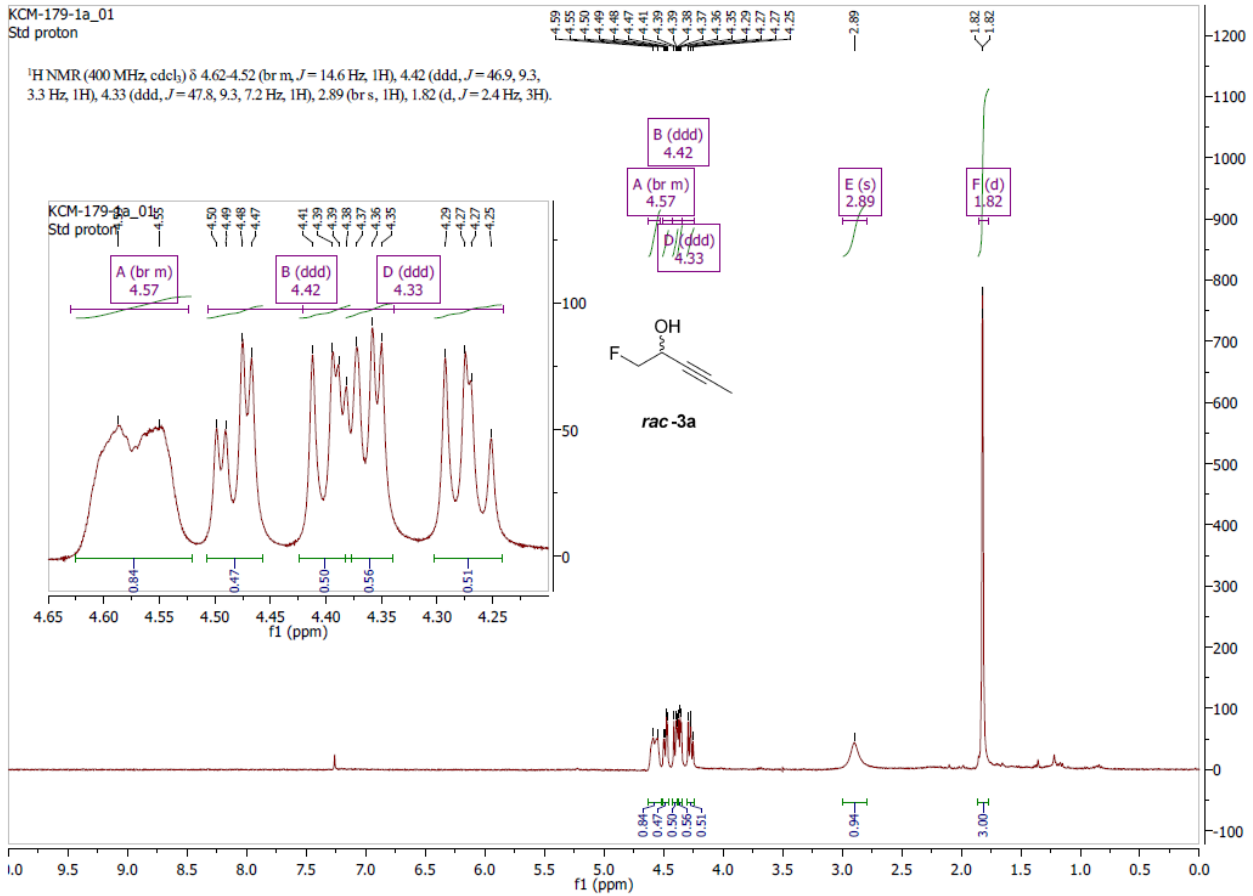

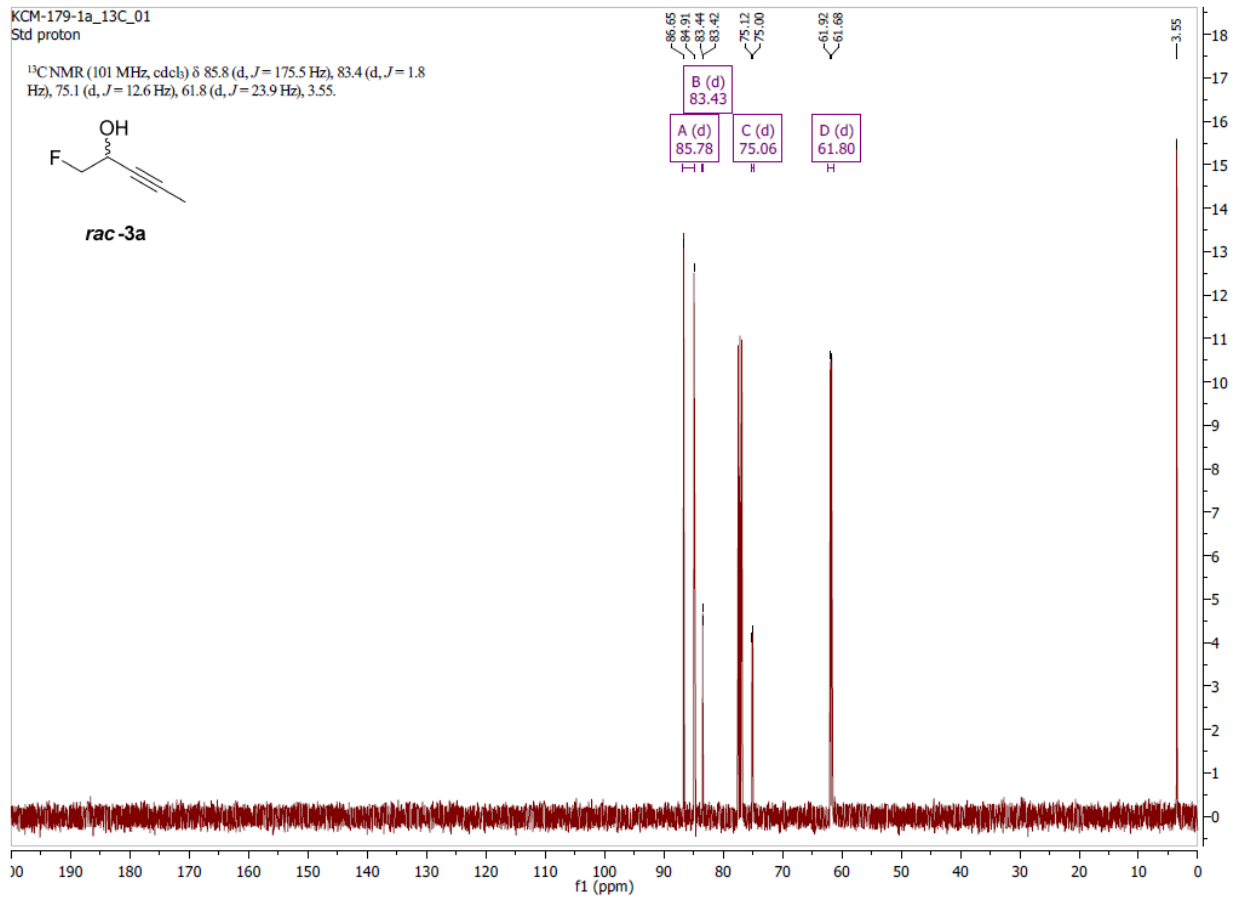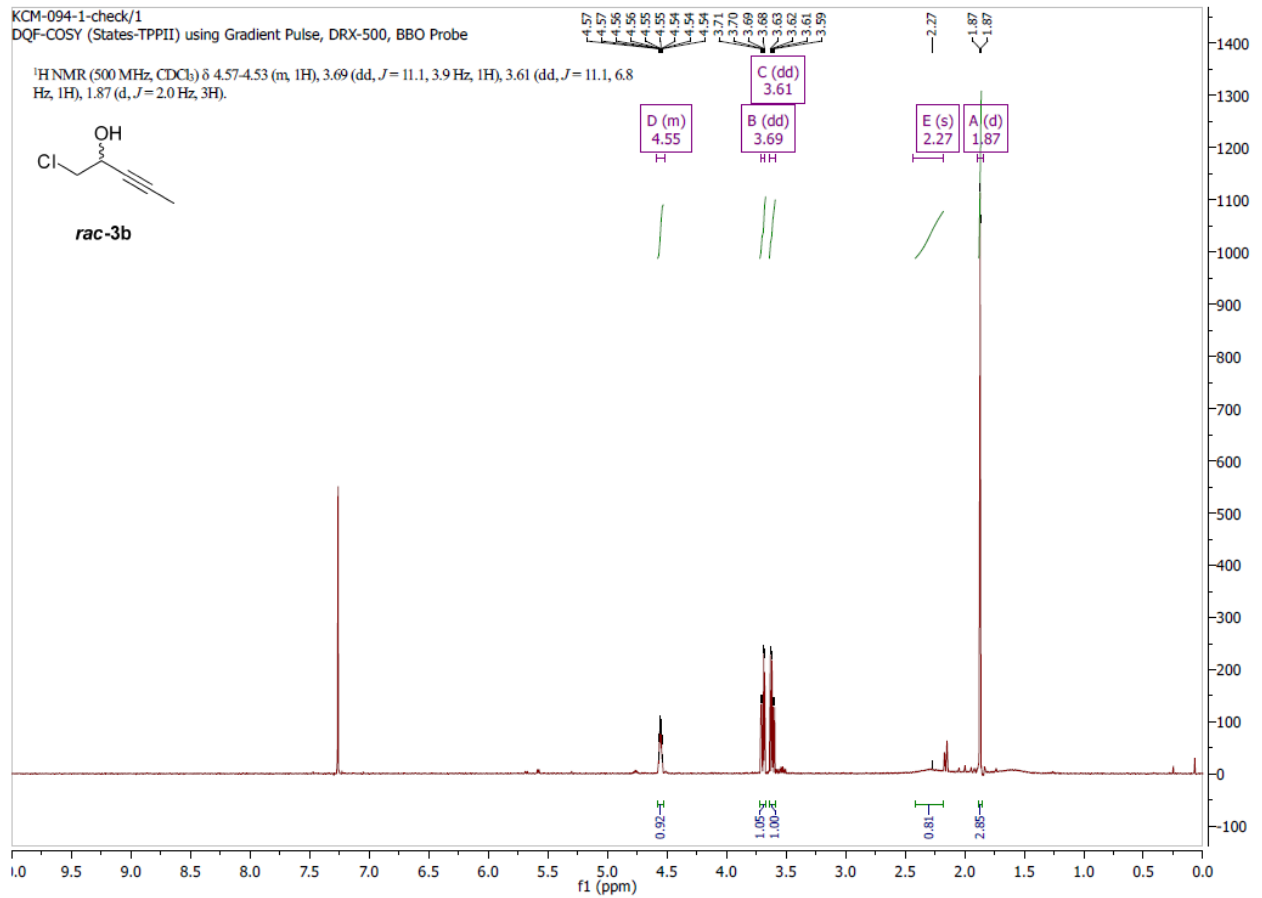

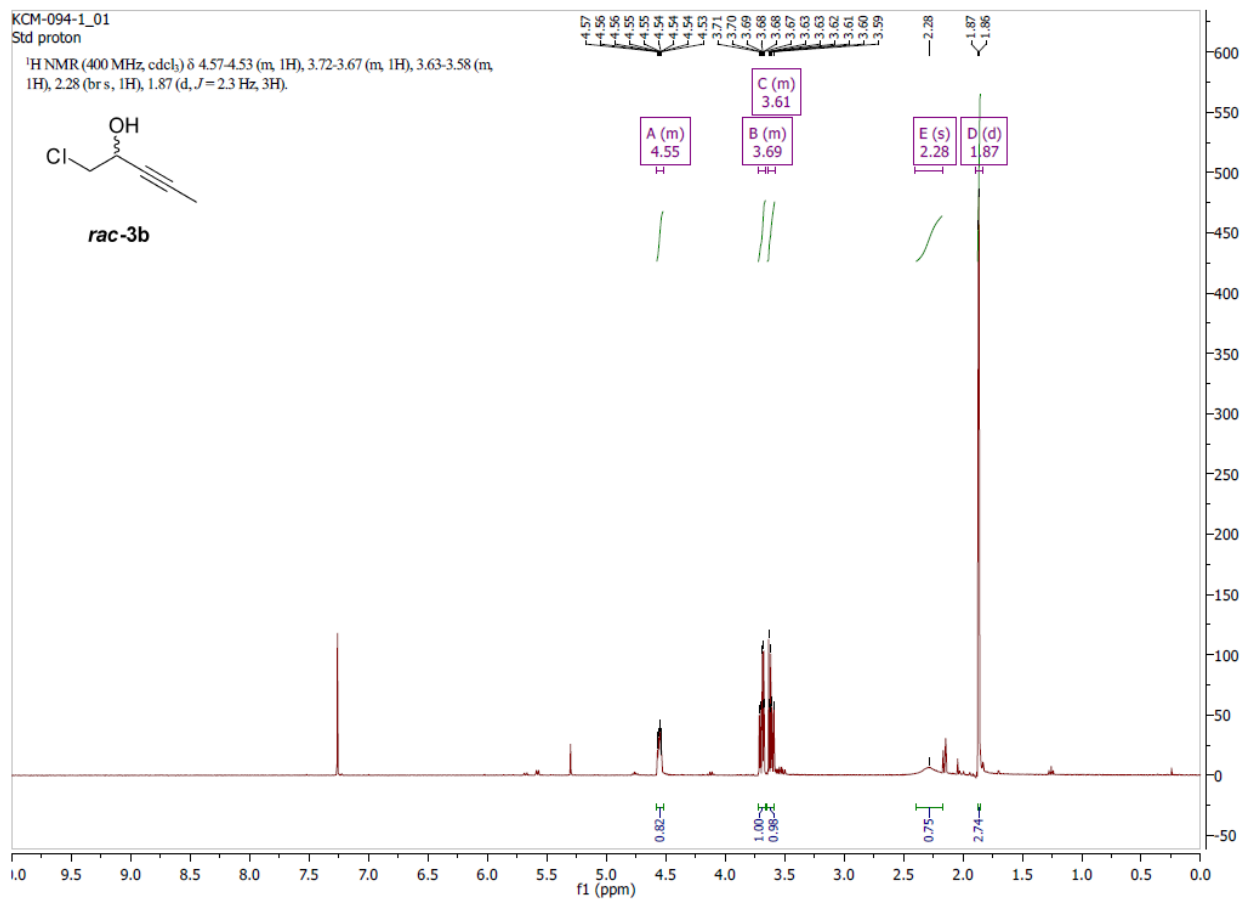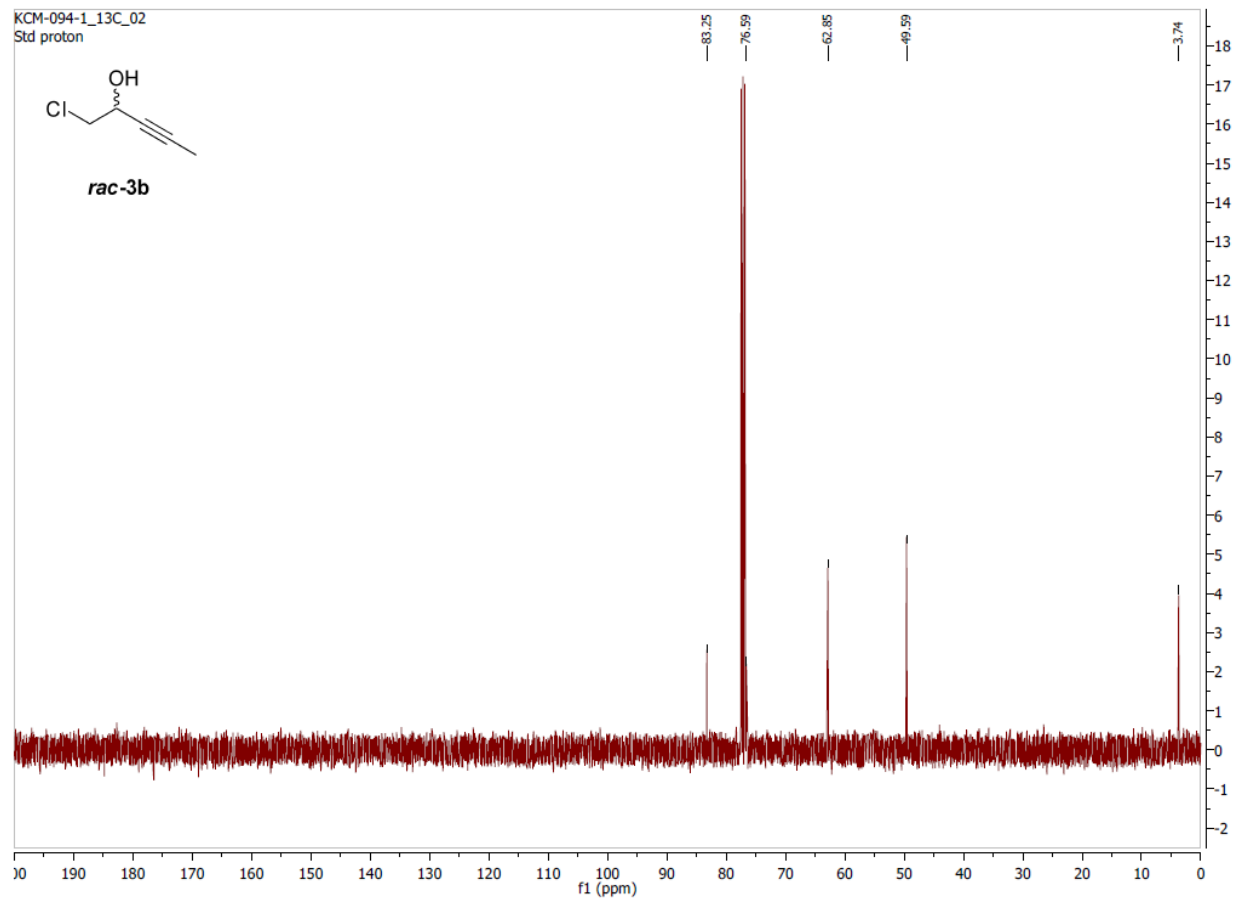

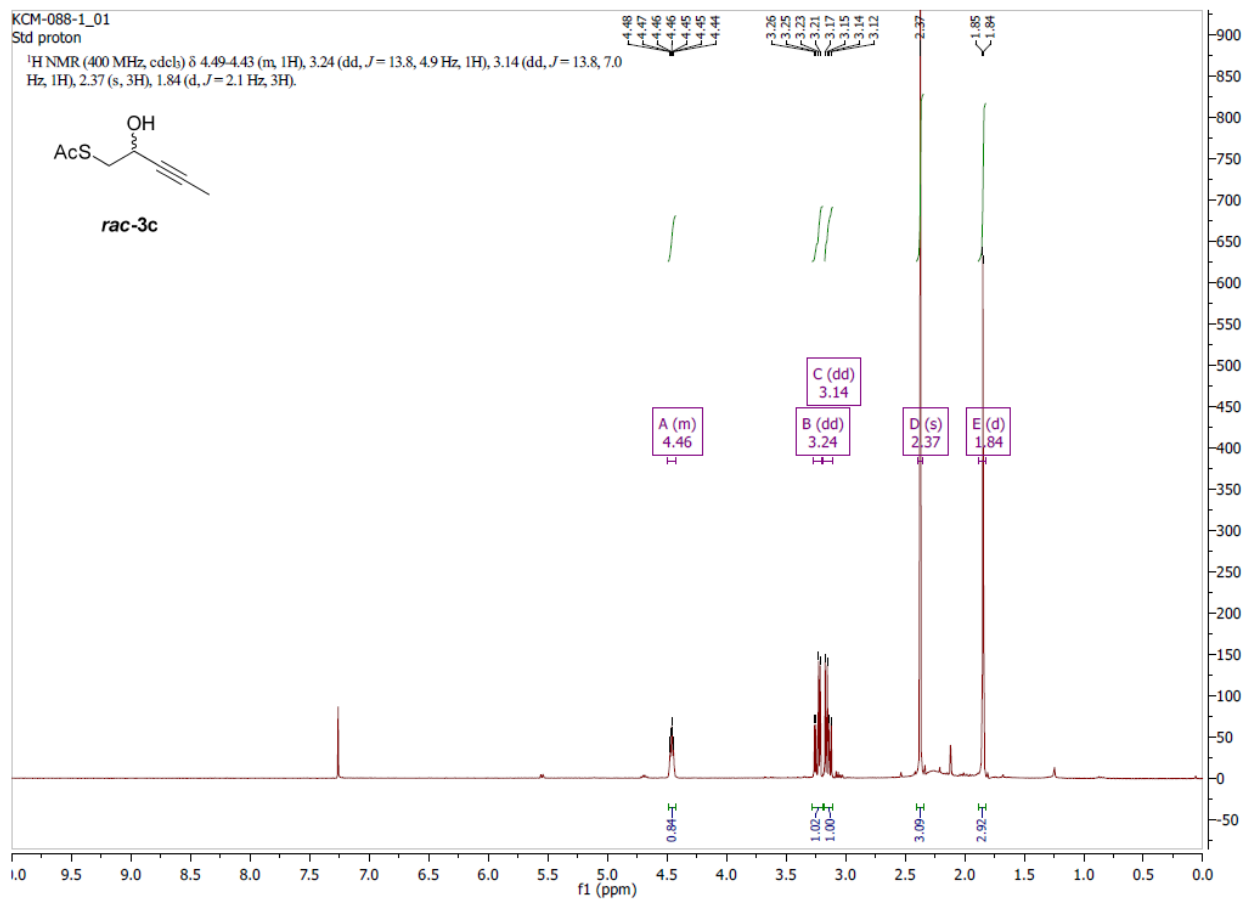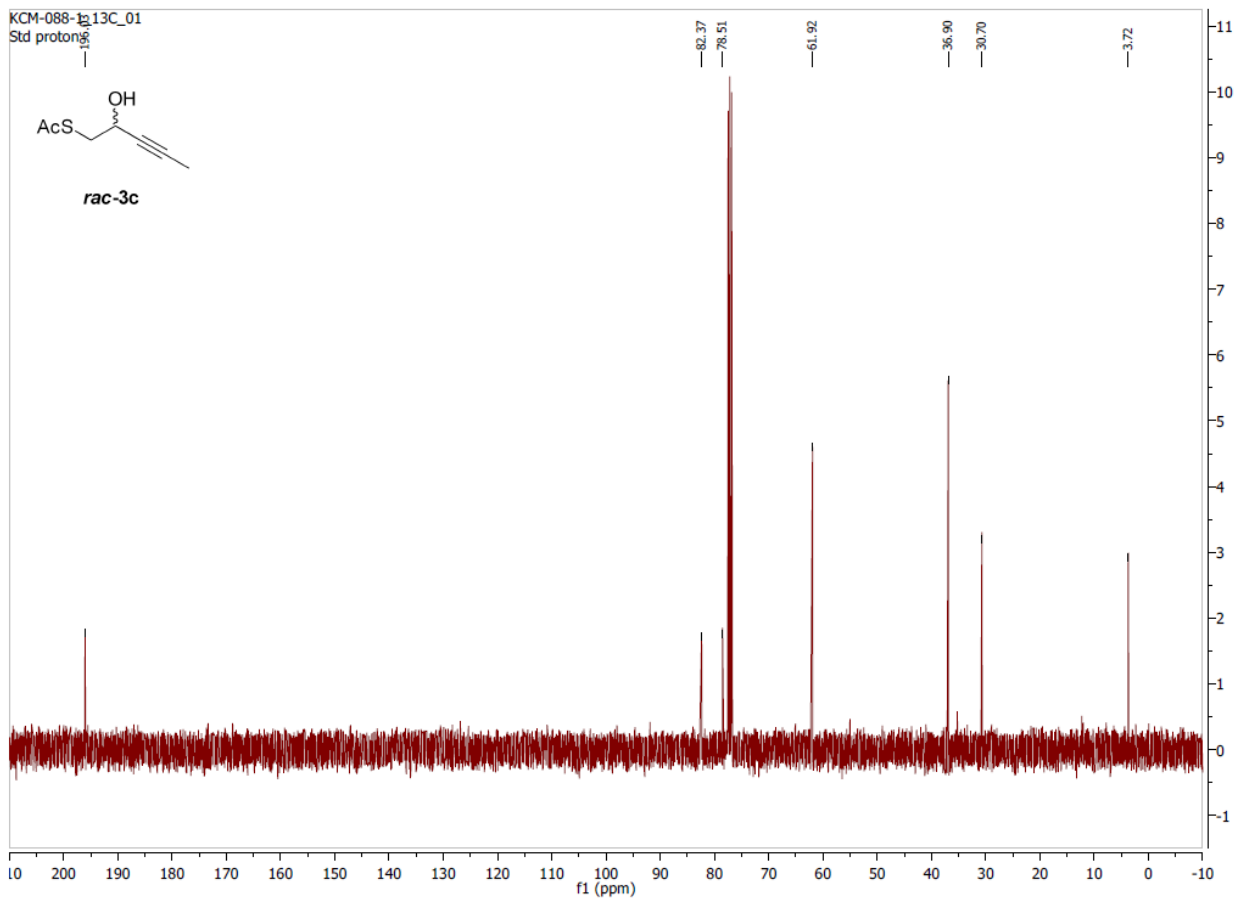

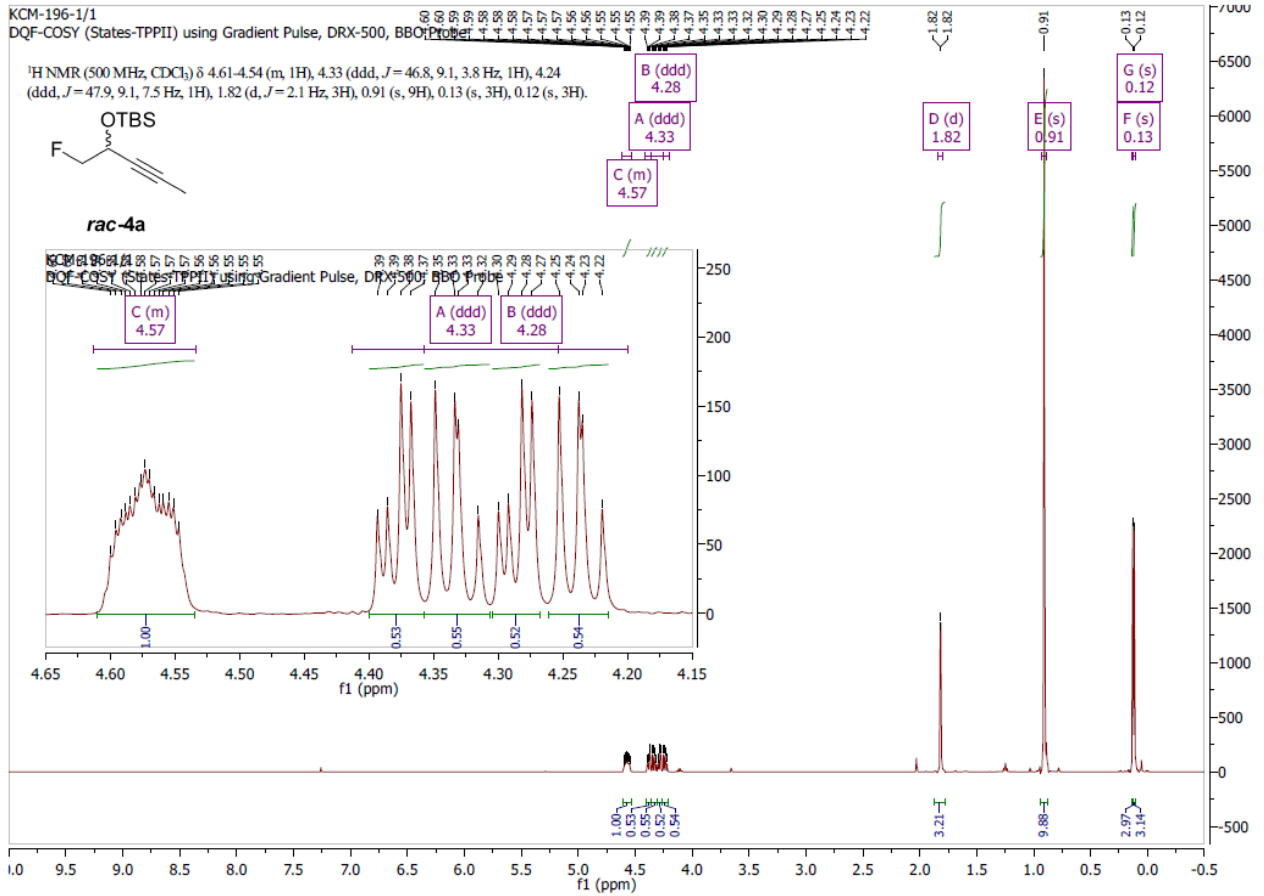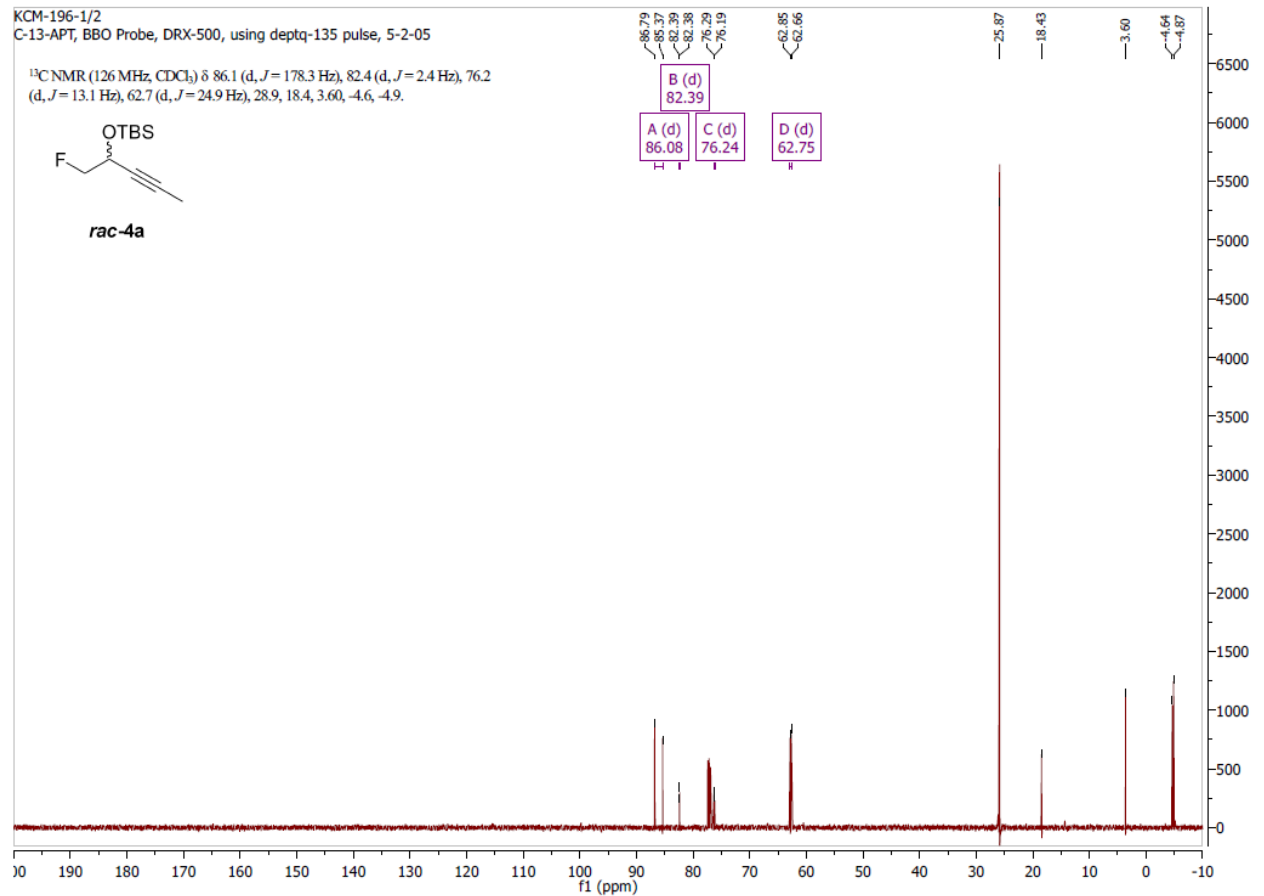



KCM-196-1/4  
F-19/CDCL3, Ref with CCl3F

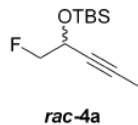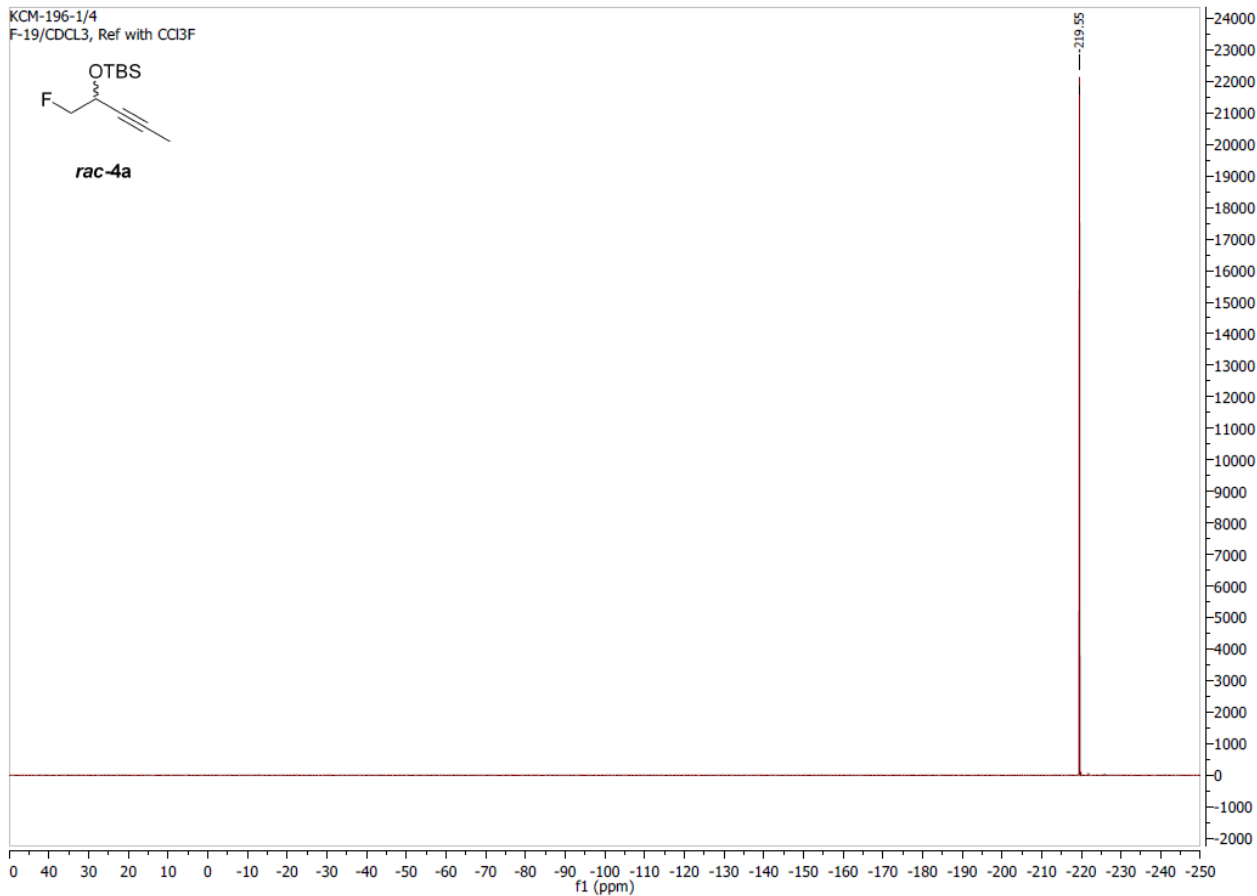

KCM-096-1/1

DQF-COSY (States-TPPII) using Gradient Pulse, DRX-500, BBO Probe

<sup>1</sup>H NMR (500 MHz, CDCl<sub>3</sub>) δ 4.48-4.44 (m, 1H), 3.55 (ddd, *J* = 10.8, 5.0, 0.6 Hz, 1H), 3.51 (ddd, *J* = 10.8, 7.3, 0.7 Hz, 1H), 1.83 (dd, *J* = 2.0, 0.7 Hz, 3H), 0.91 (d, *J* = 0.8 Hz, 10H), 0.14 (s, 3H), 0.13 (s, 3H).

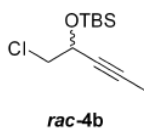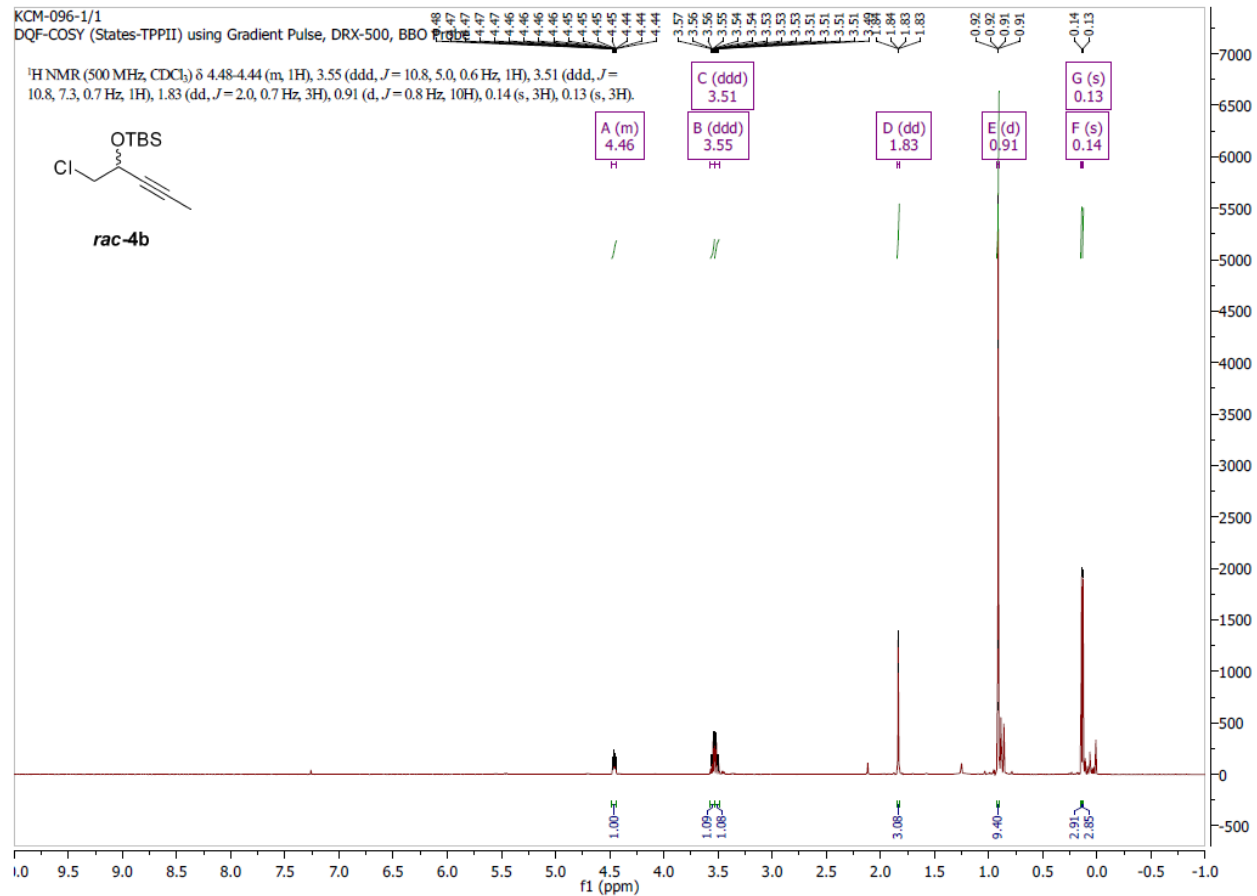

KCM-096-1\_13C/1  
 C-13-APT, BBO Probe, DRX-500, using deptq-135 pulse, 5-2-05

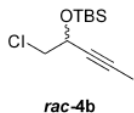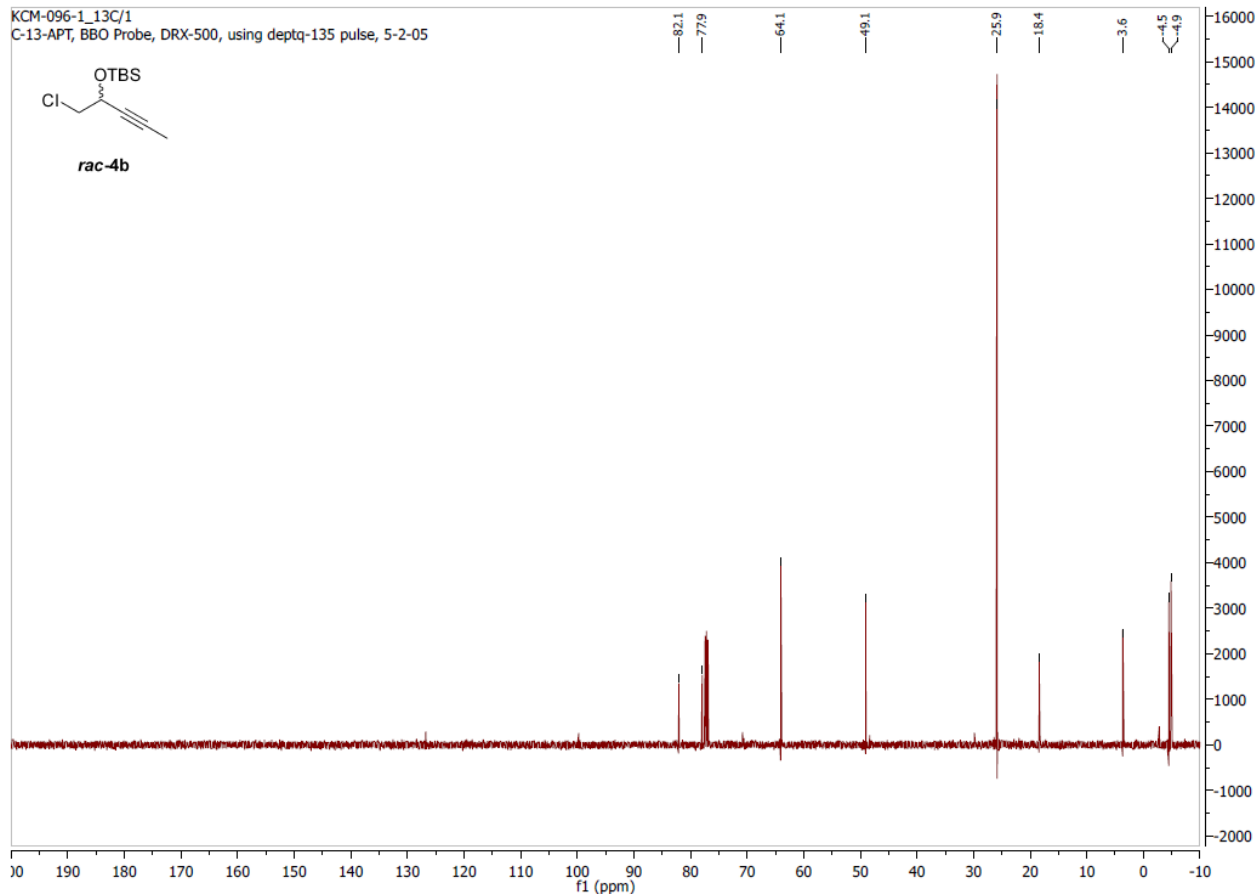

KCM-101-1\_01  
 Std proton

<sup>1</sup>H NMR (400 MHz, cdcl<sub>3</sub>) δ 4.39-4.34 (m, 1H), 3.15 (dd, *J* = 13.4, 5.9 Hz, 1H), 3.09 (dd, *J* = 13.4, 7.0 Hz, 1H), 2.32 (s, 3H), 1.81 (d, *J* = 2.1 Hz, 3H), 0.89 (s, 9H), 0.11 (s, 3H), 0.09 (s, 3H).

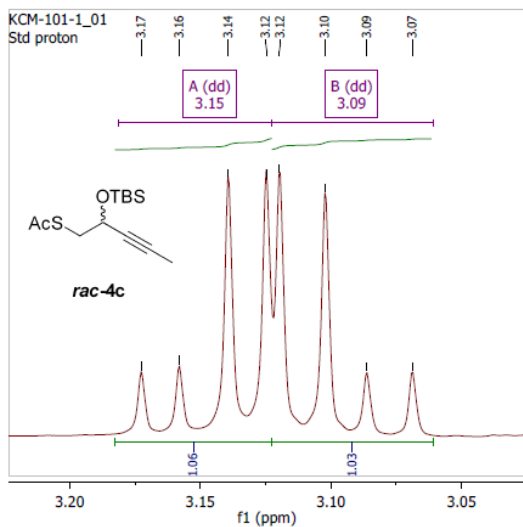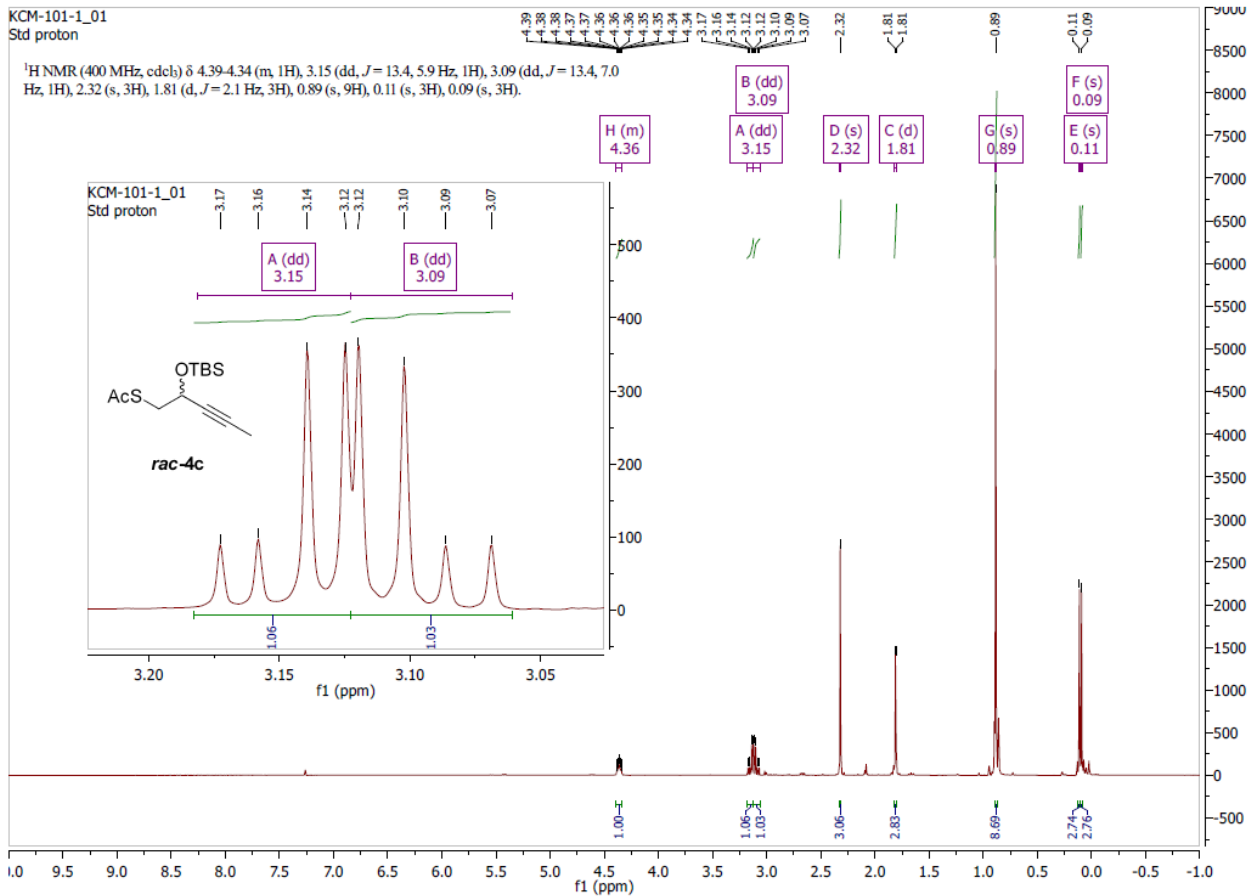

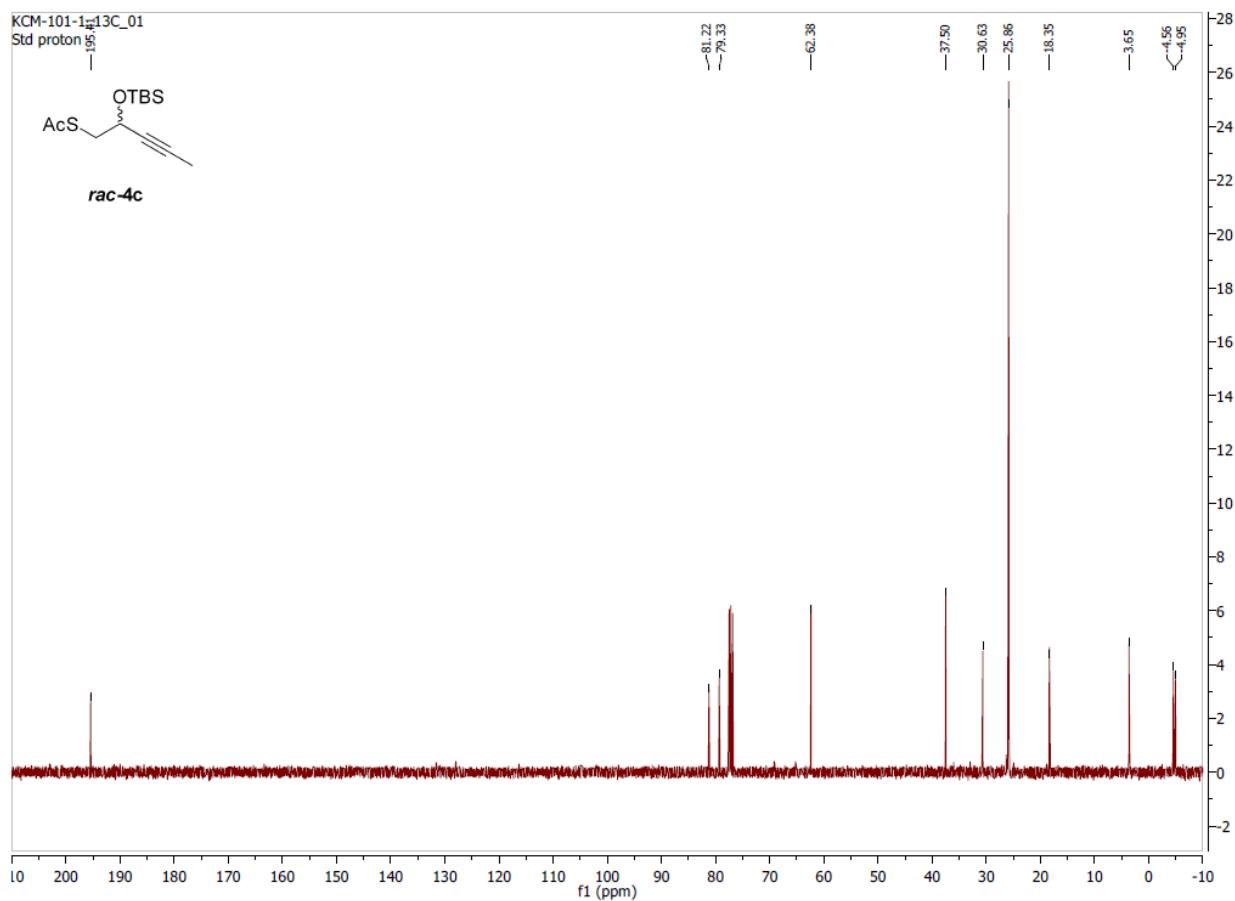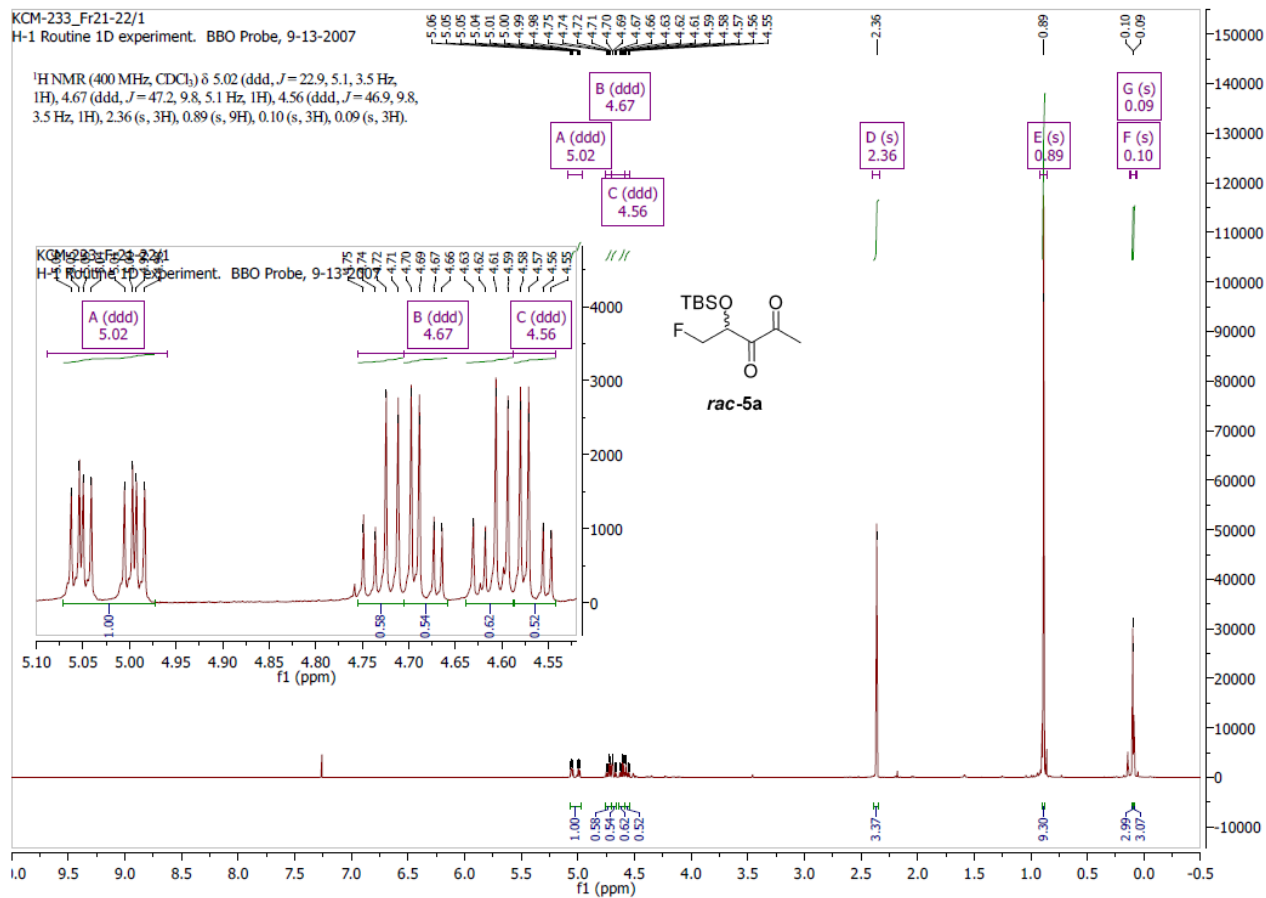

KCM-233\_Fr21-22/6  
C-13 Routine 1D, DCH CryoProbe, 10-26-2006

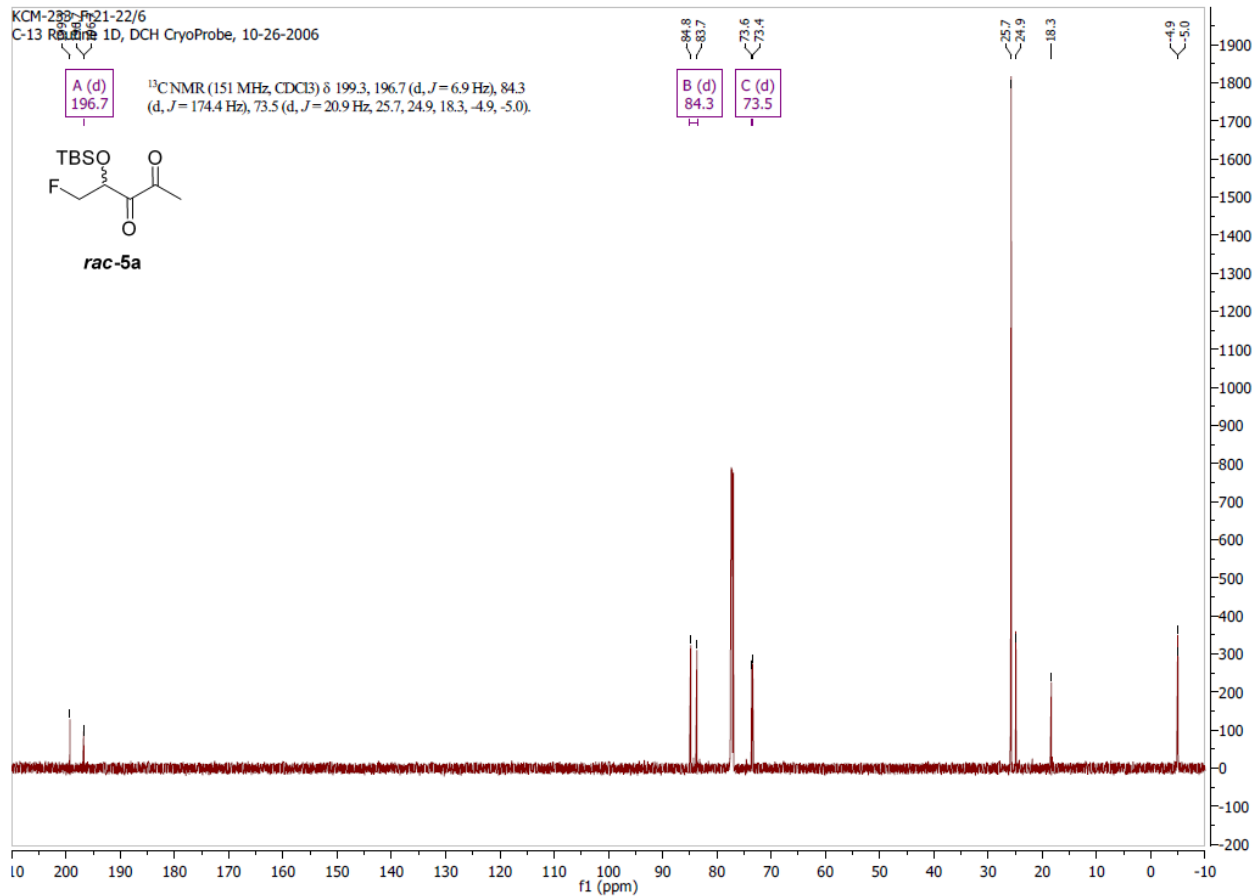

KCM-233\_Fr25-26/2  
F-19/ $\text{CDCl}_3$ , Ref with  $\text{CCl}_3\text{F}$

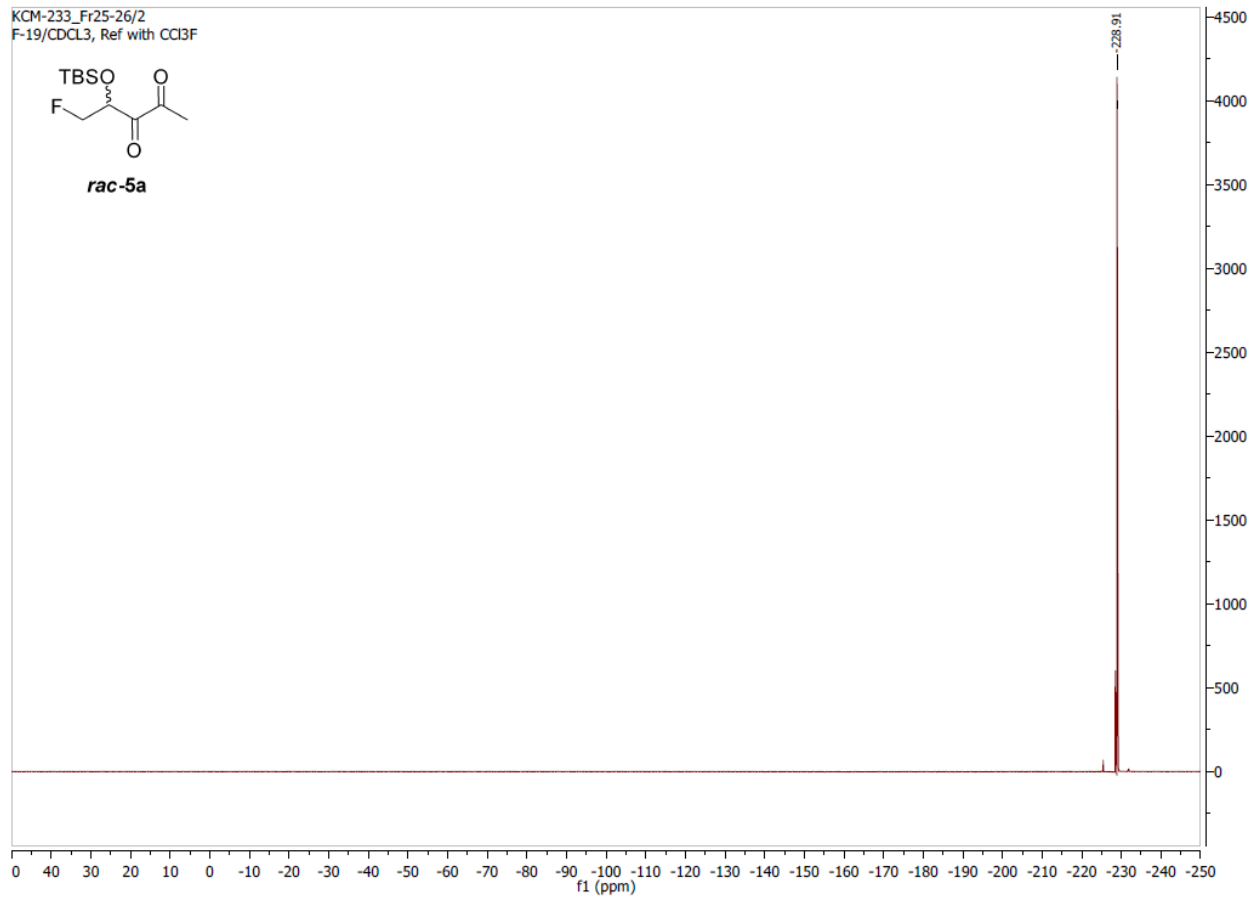

KCM-099-1a/1

H-1 Routine 1D experiment. BBO Probe, 9-13-2007

$^1\text{H}$  NMR (400 MHz,  $\text{CDCl}_3$ )  $\delta$  5.06 (t,  $J = 5.0$  Hz, 1H), 3.84-3.79 (m, 1H), 3.79-3.74 (m, 1H), 2.41 (s, 3H), 0.92 (s, 9H), 0.13 (s, 3H), 0.12 (s, 3H).

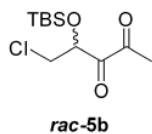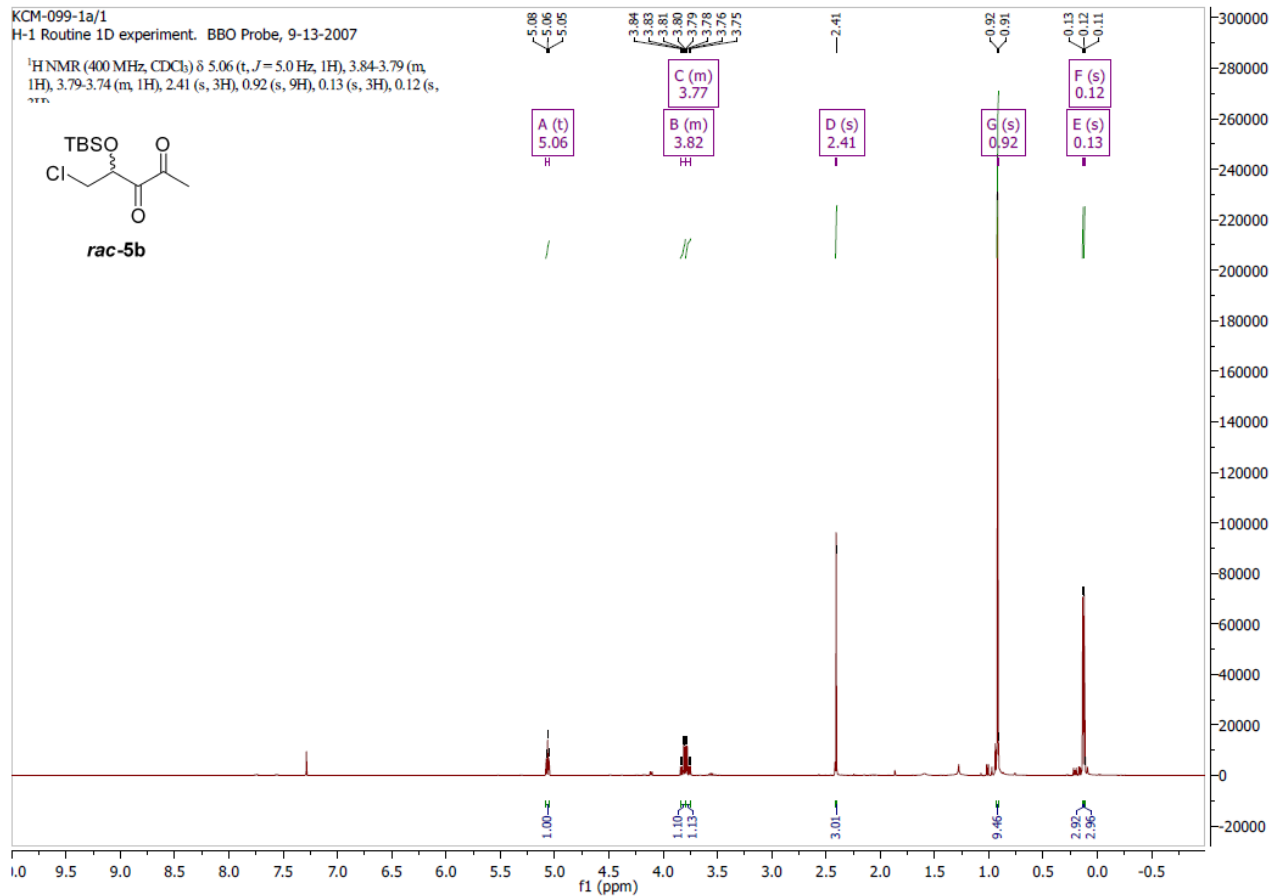

KCM-099-1a\_01

Std protngs

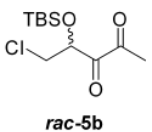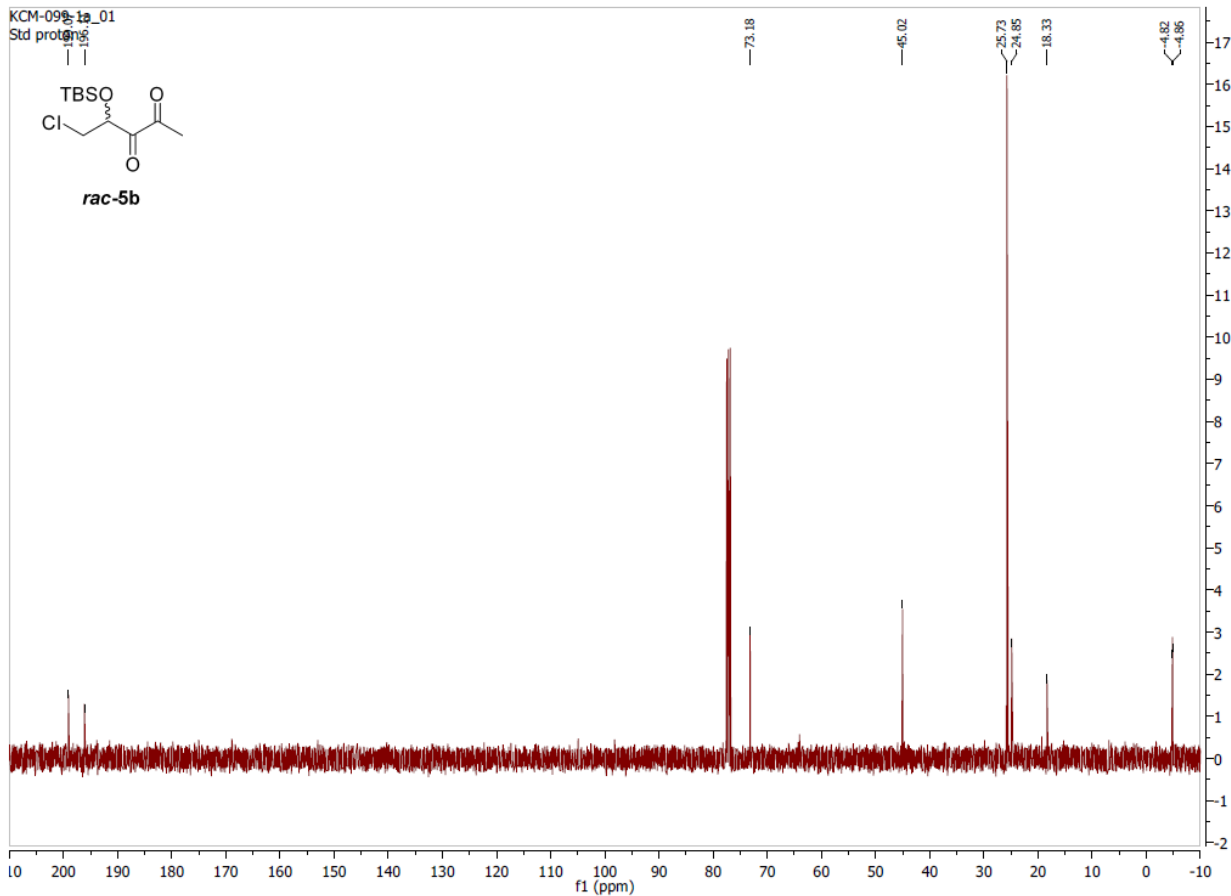

KCM-102-2/1  
H-1 Routine 1D experiment. BBO Probe, 9-13-2007

$^1\text{H NMR}$  (400 MHz,  $\text{CDCl}_3$ )  $\delta$  5.10 (dd,  $J=6.8, 3.9$  Hz, 1H), 3.38 (dd,  $J=13.9, 3.9$  Hz, 1H), 3.08 (dd,  $J=13.9, 6.8$  Hz, 1H), 2.35 (s, 3H), 2.29 (s, 3H), 0.87 (s, 9H), 0.09 (s, 3H), 0.06 (s, 3H).

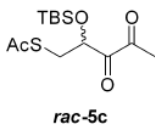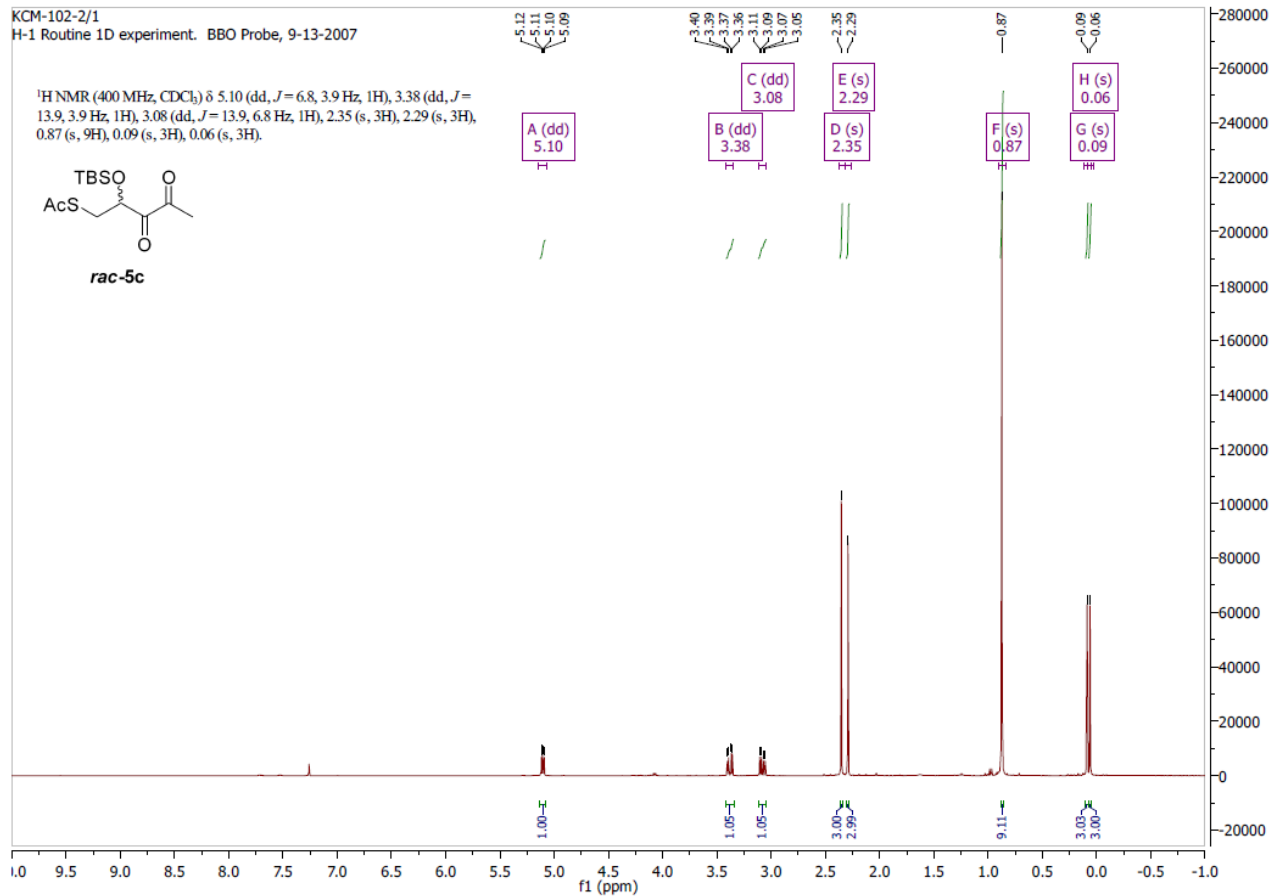

KCM-102-2-13C\_01  
Std protob

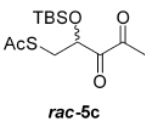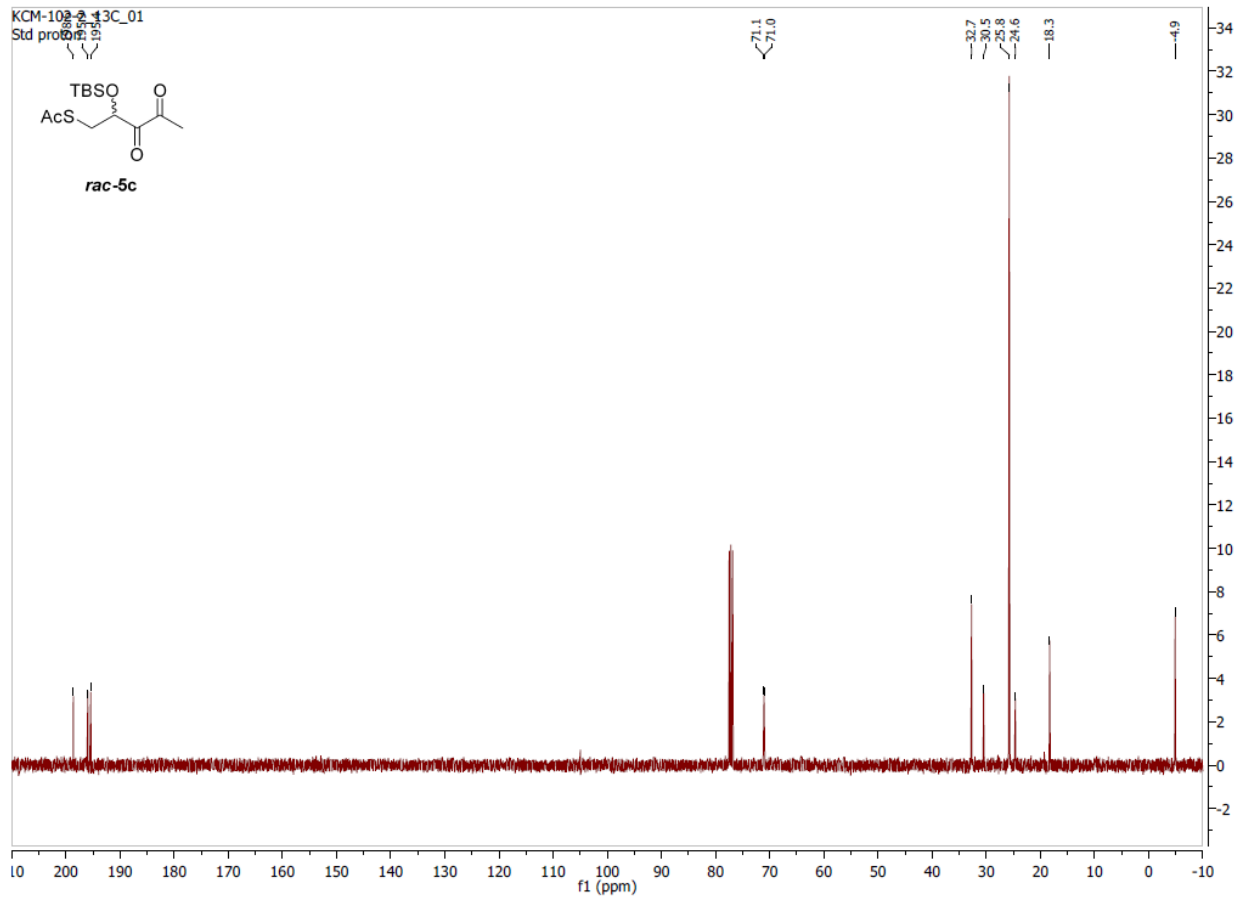

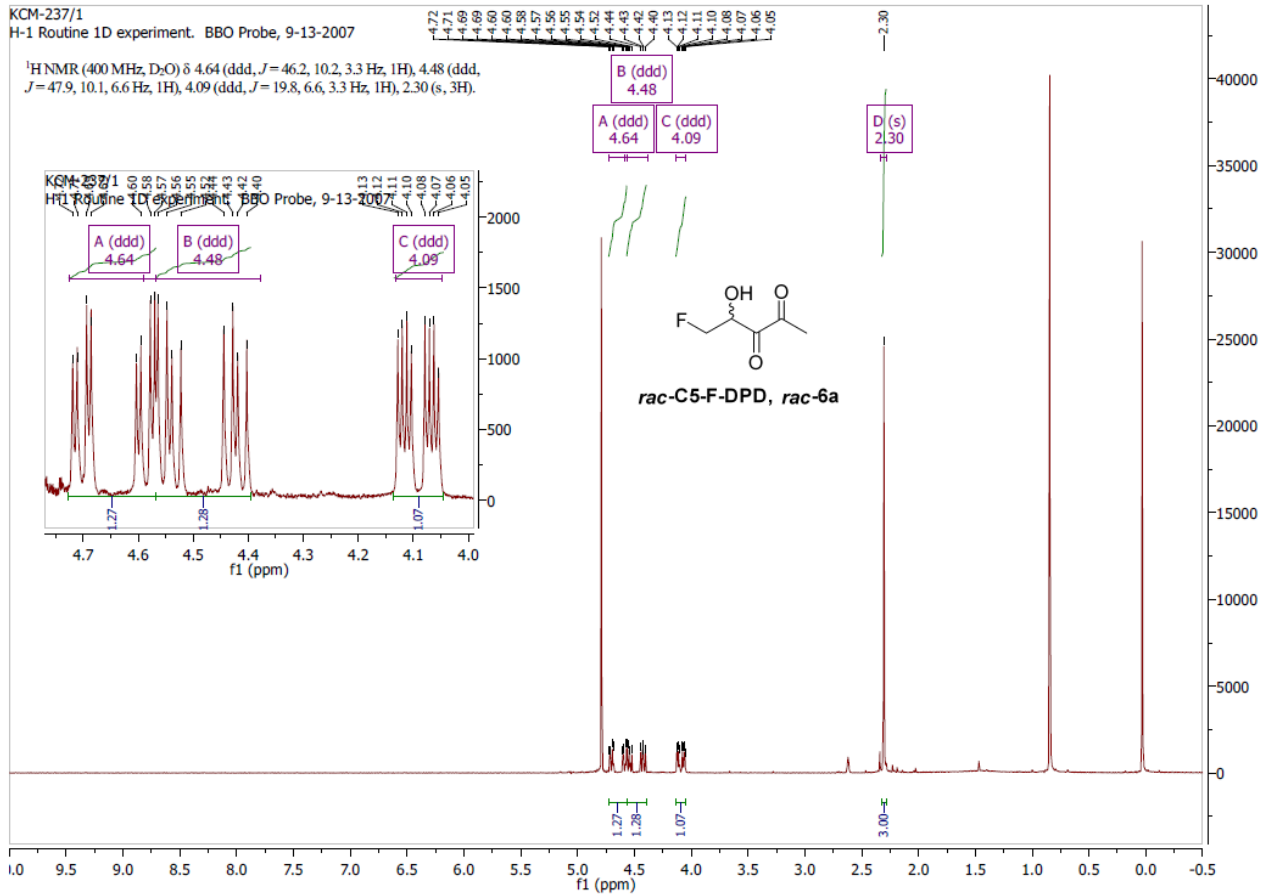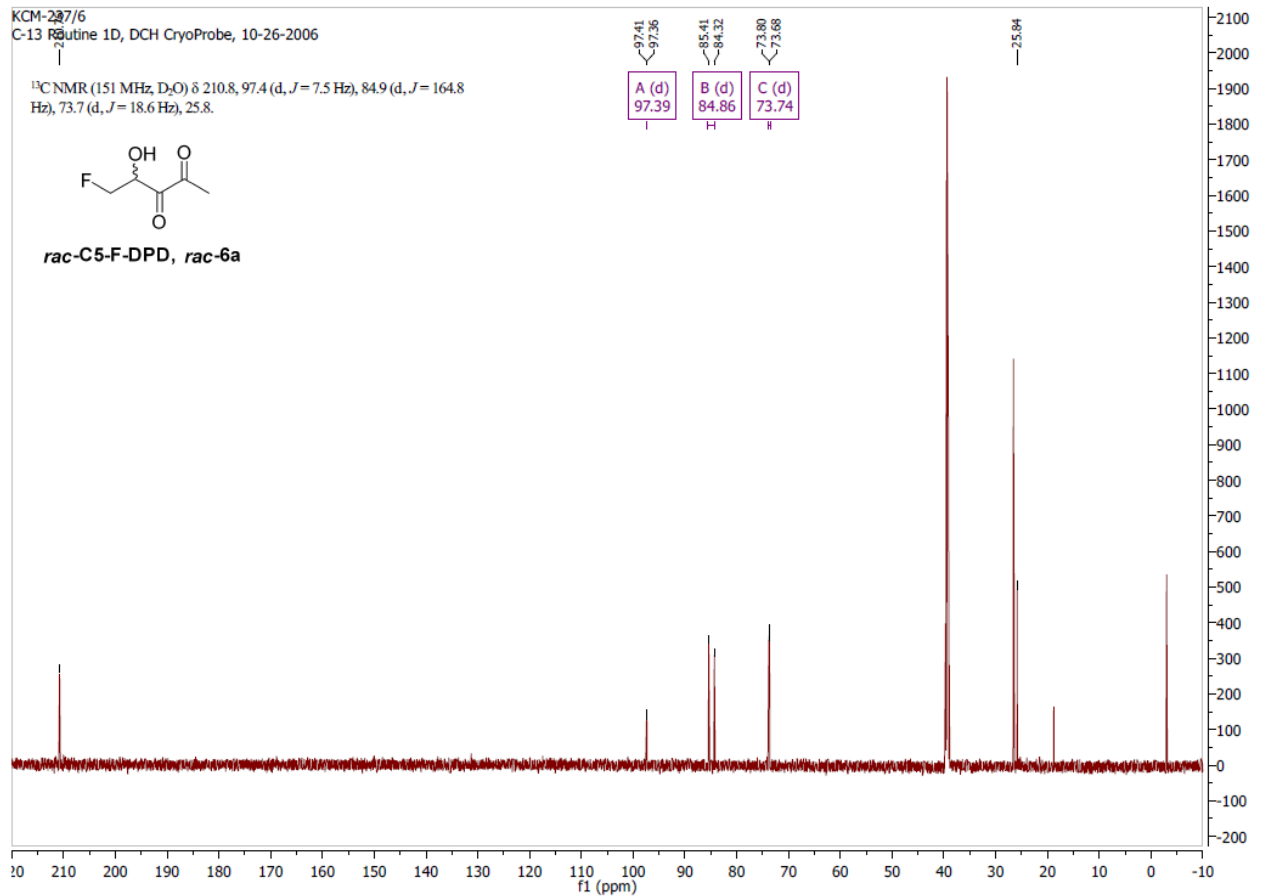

KCM-237/2  
F-19/CDCl<sub>3</sub>, Ref with CCl<sub>3</sub>F

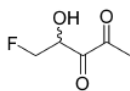

*rac*-C5-F-DPD, *rac*-6a

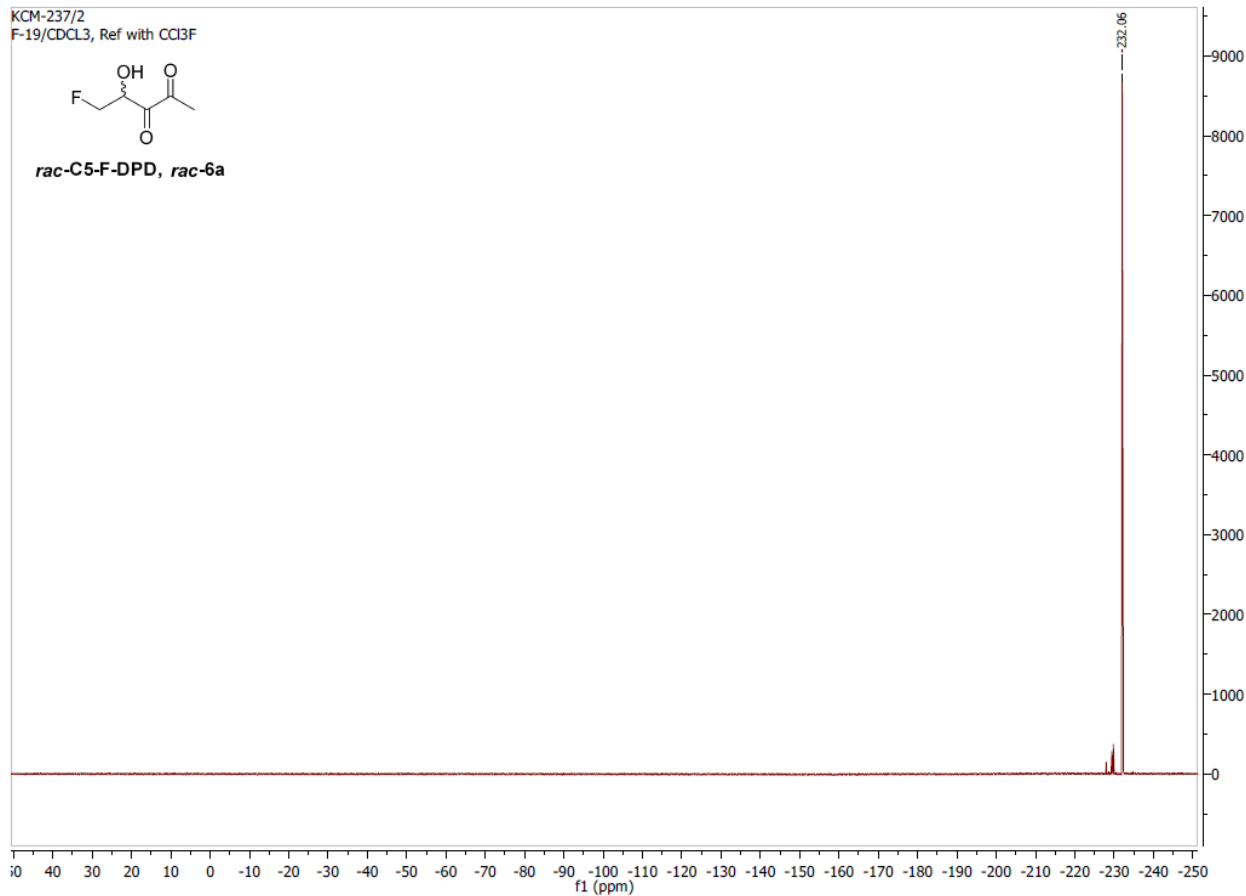

KCM-232/2  
H-1 Routine 1D, DCH CryoProbe, 1-13-2006

<sup>1</sup>H NMR (600 MHz, D<sub>2</sub>O) δ 4.11 (dd, *J* = 9.4, 2.5 Hz, 1H), 3.92 (dd, *J* = 11.8, 2.5 Hz, 1H), 3.61 (dd, *J* = 11.8, 9.4 Hz, 1H), 2.39 (s, 3H).

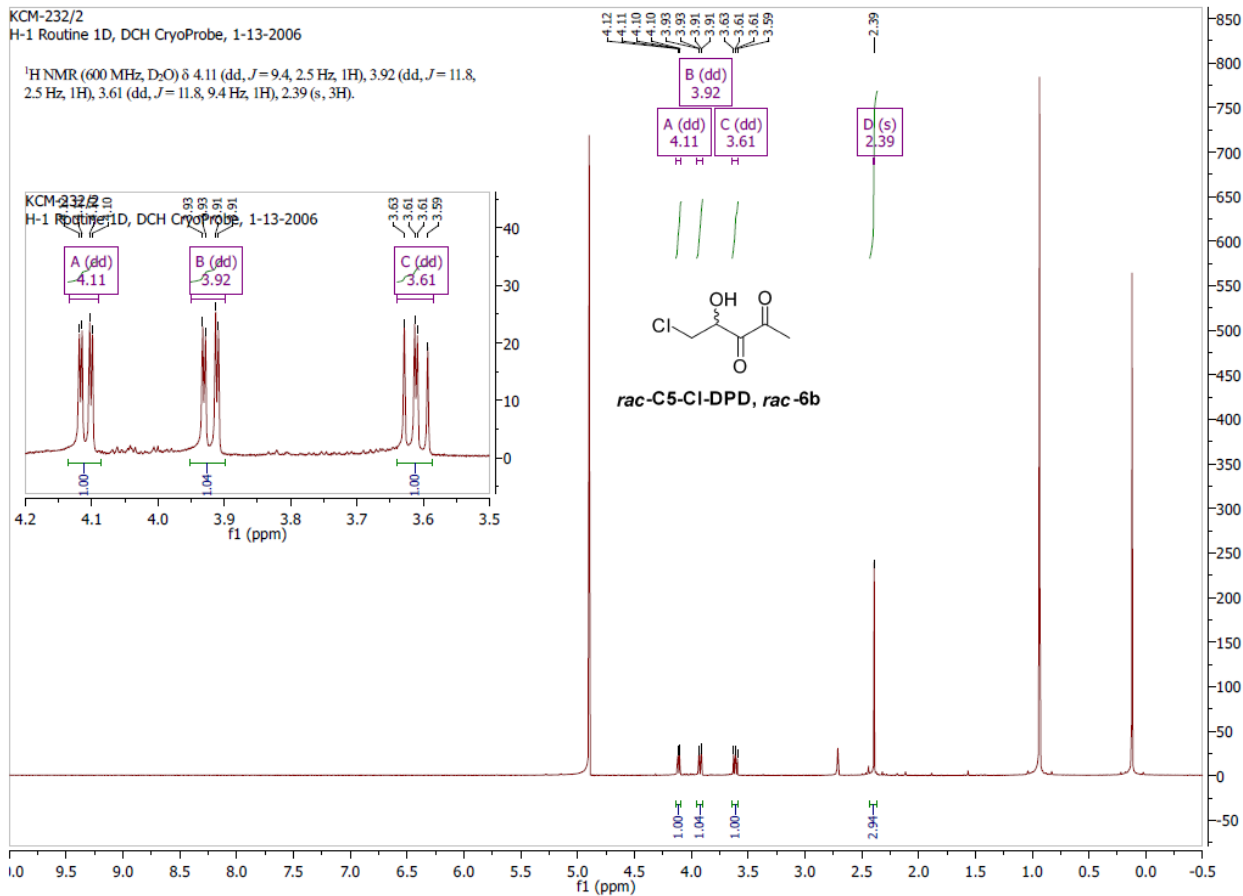



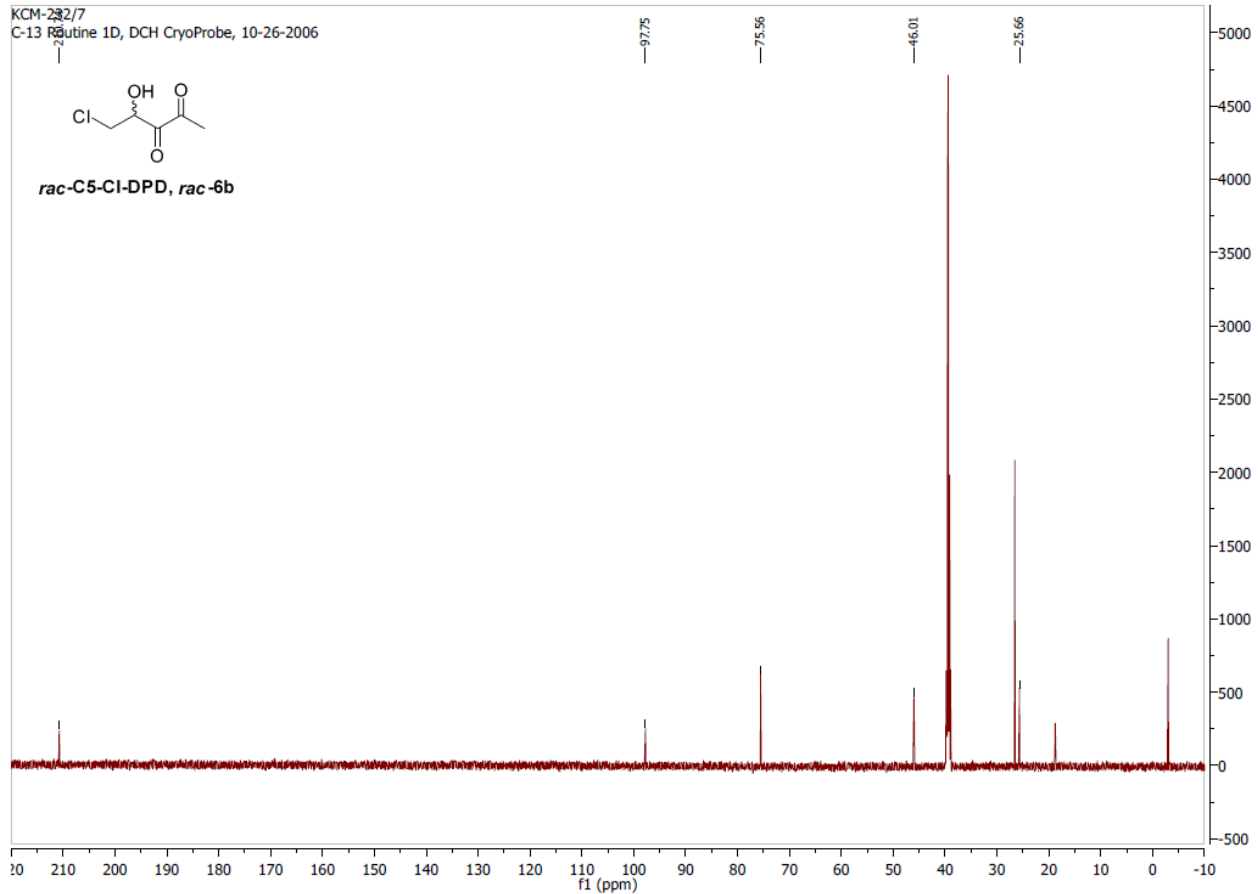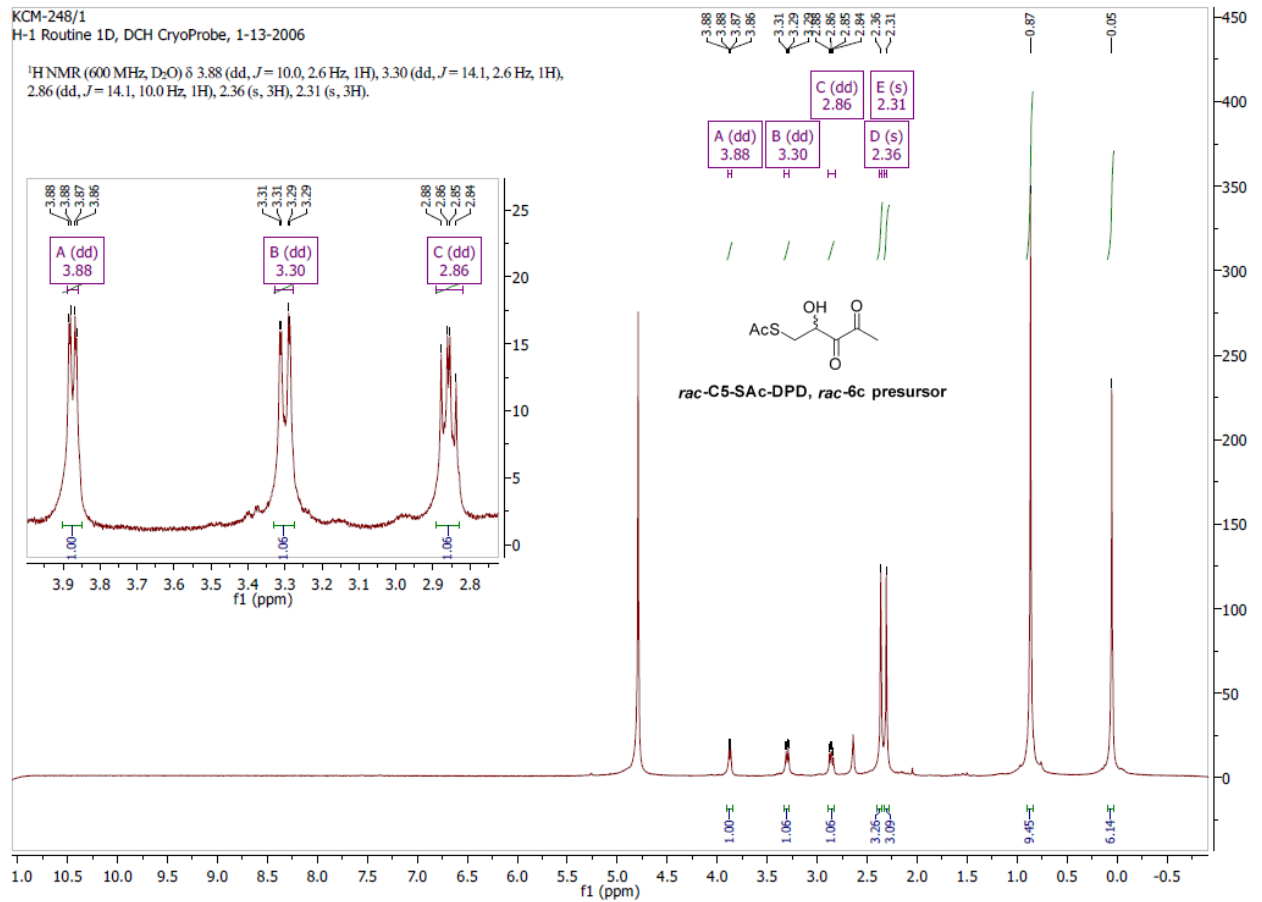

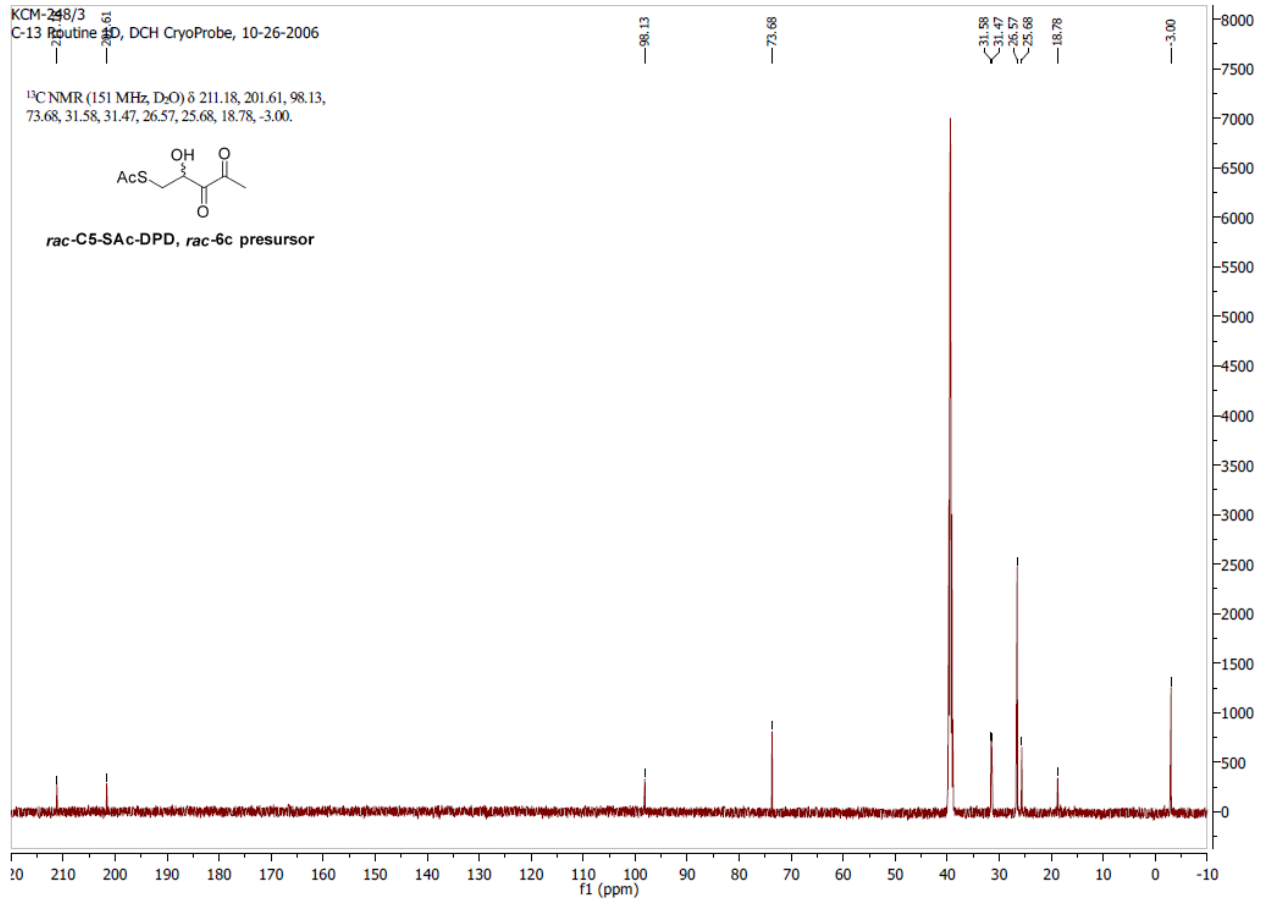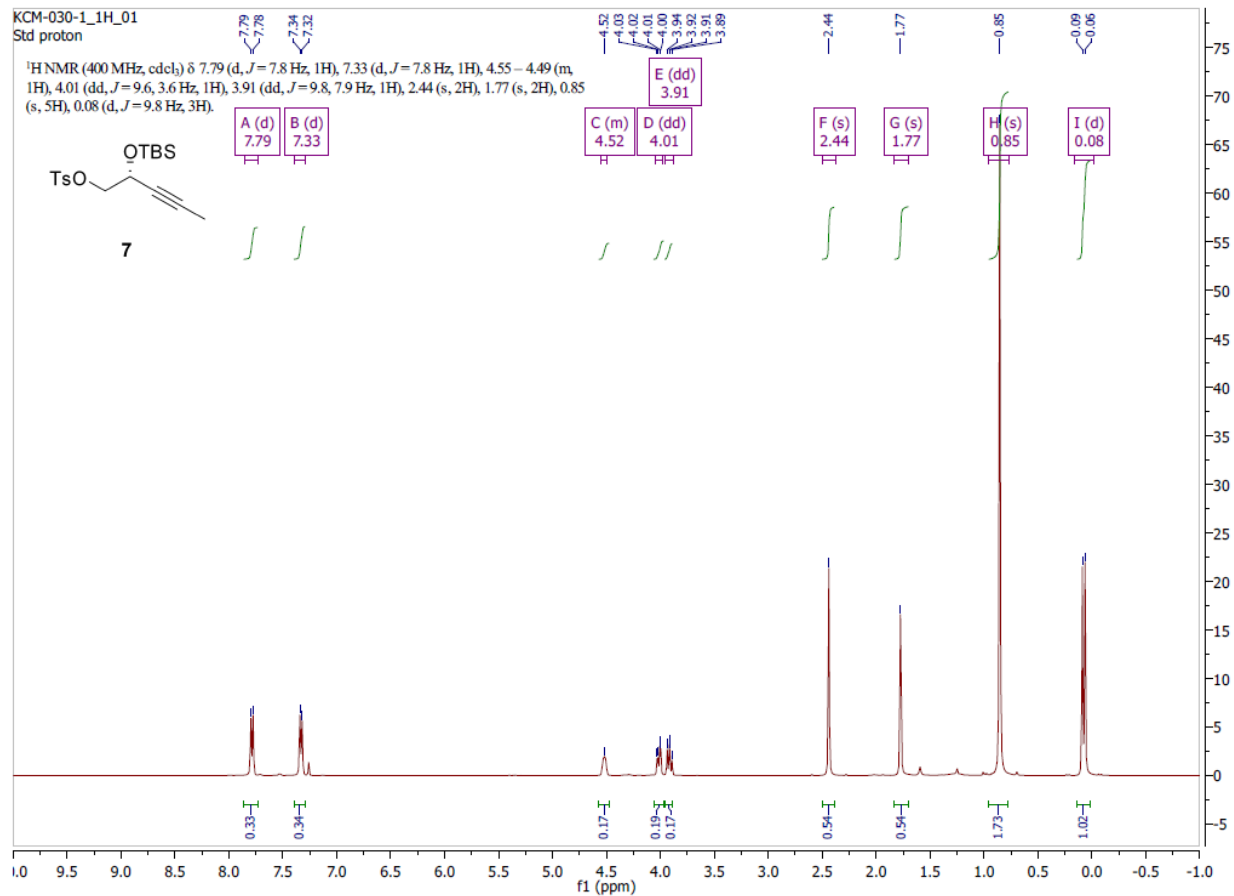

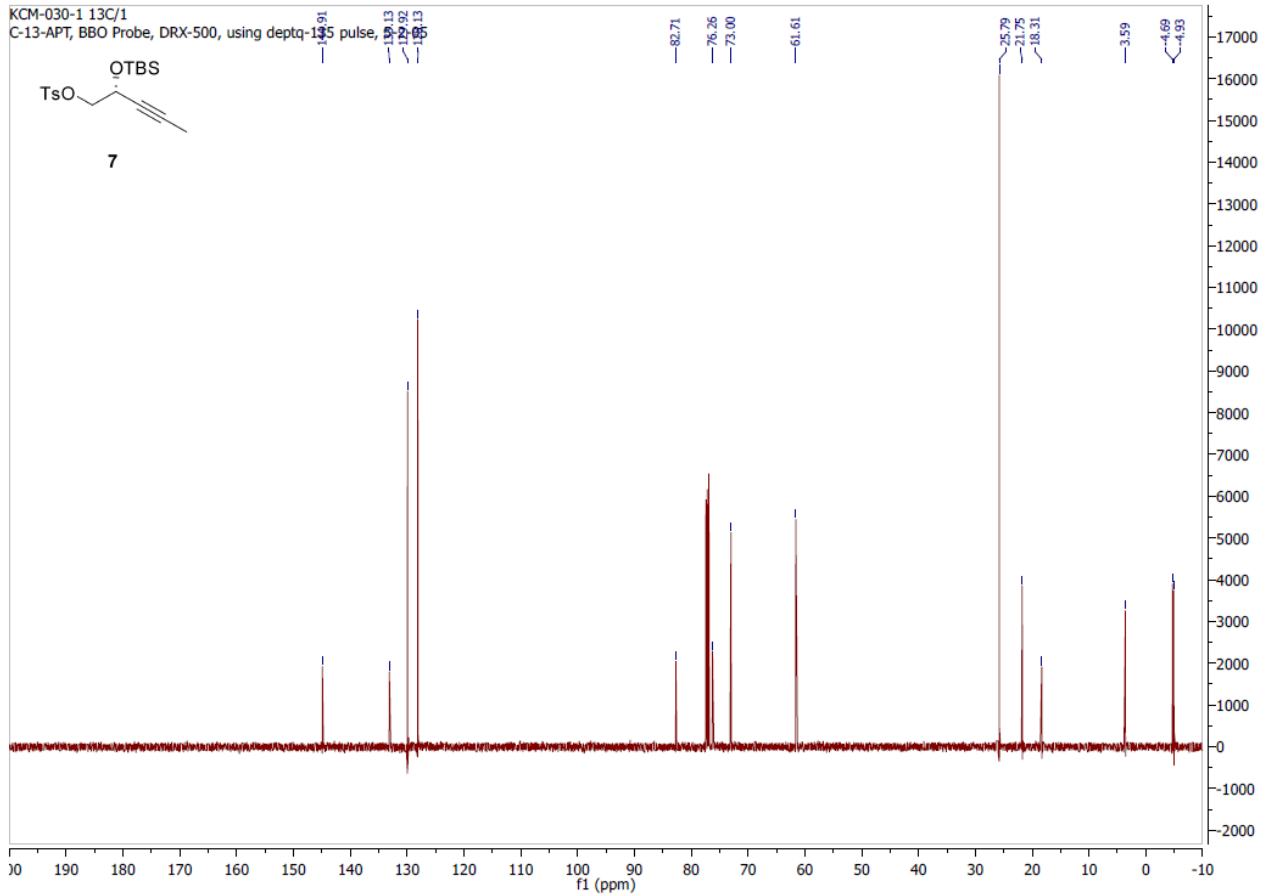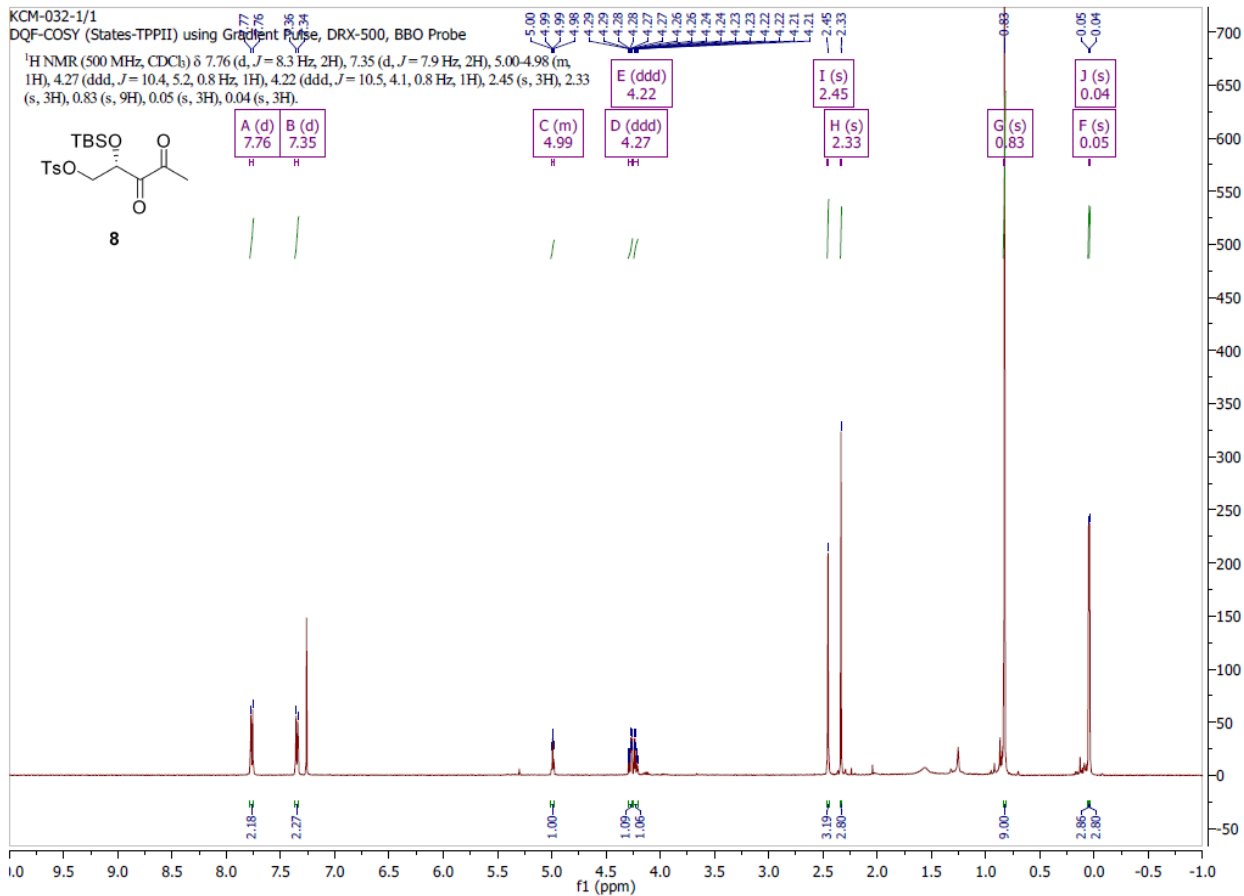



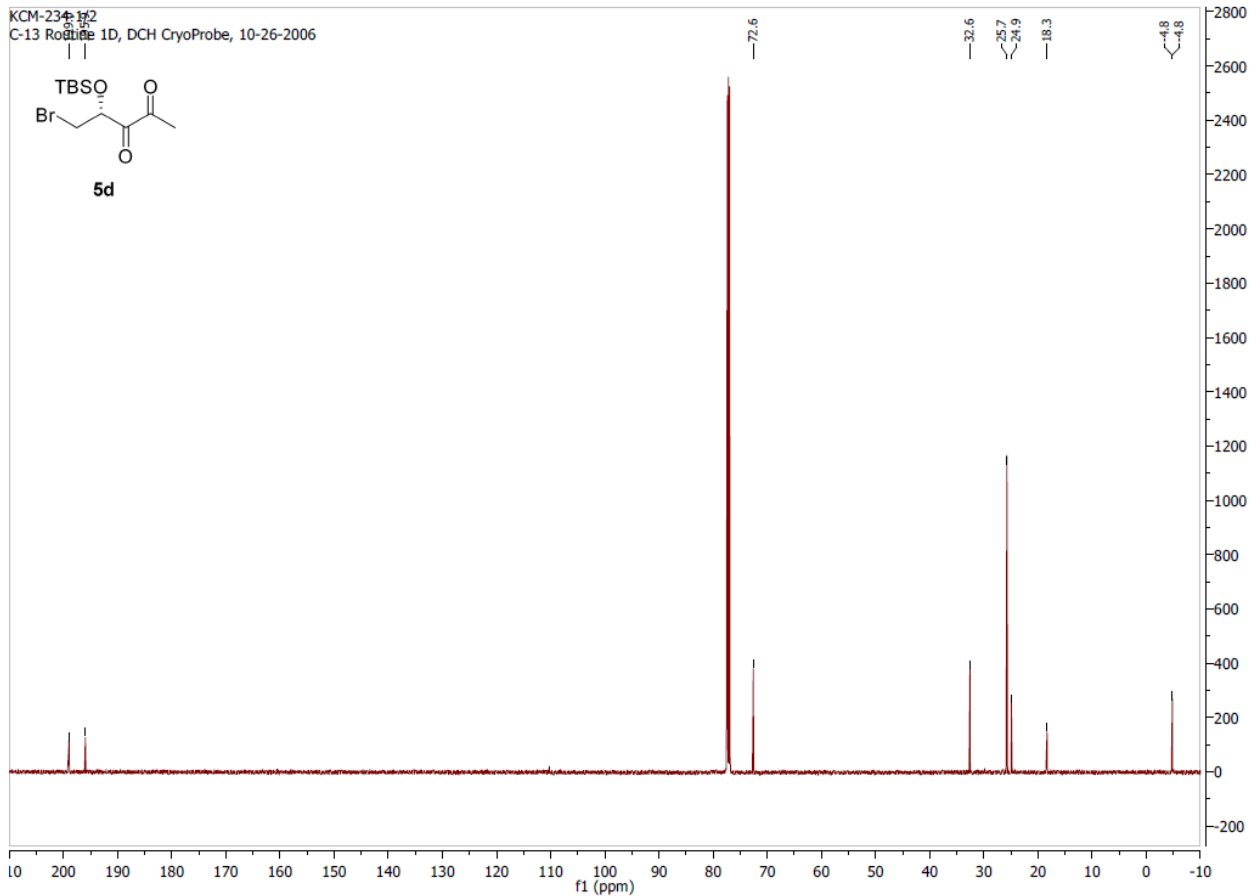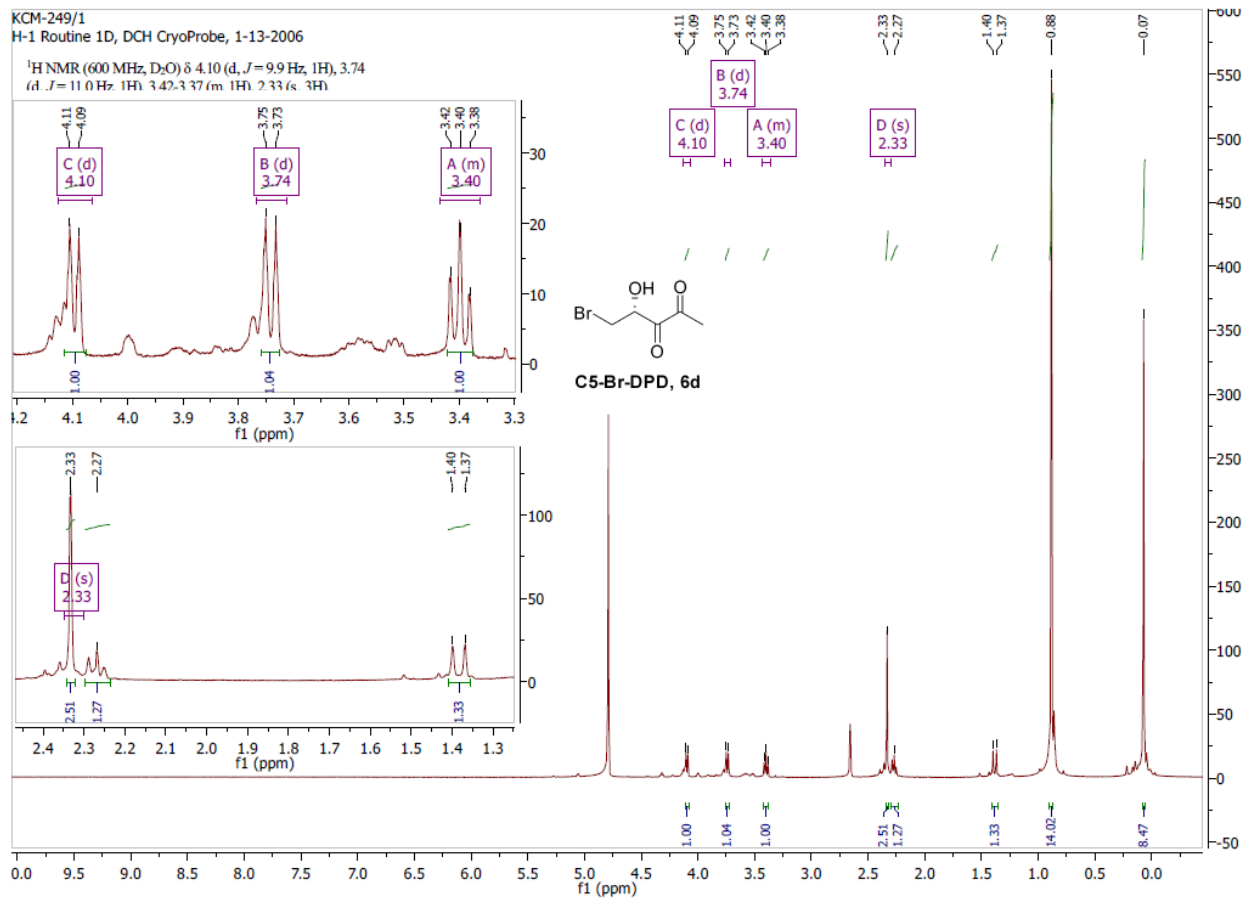

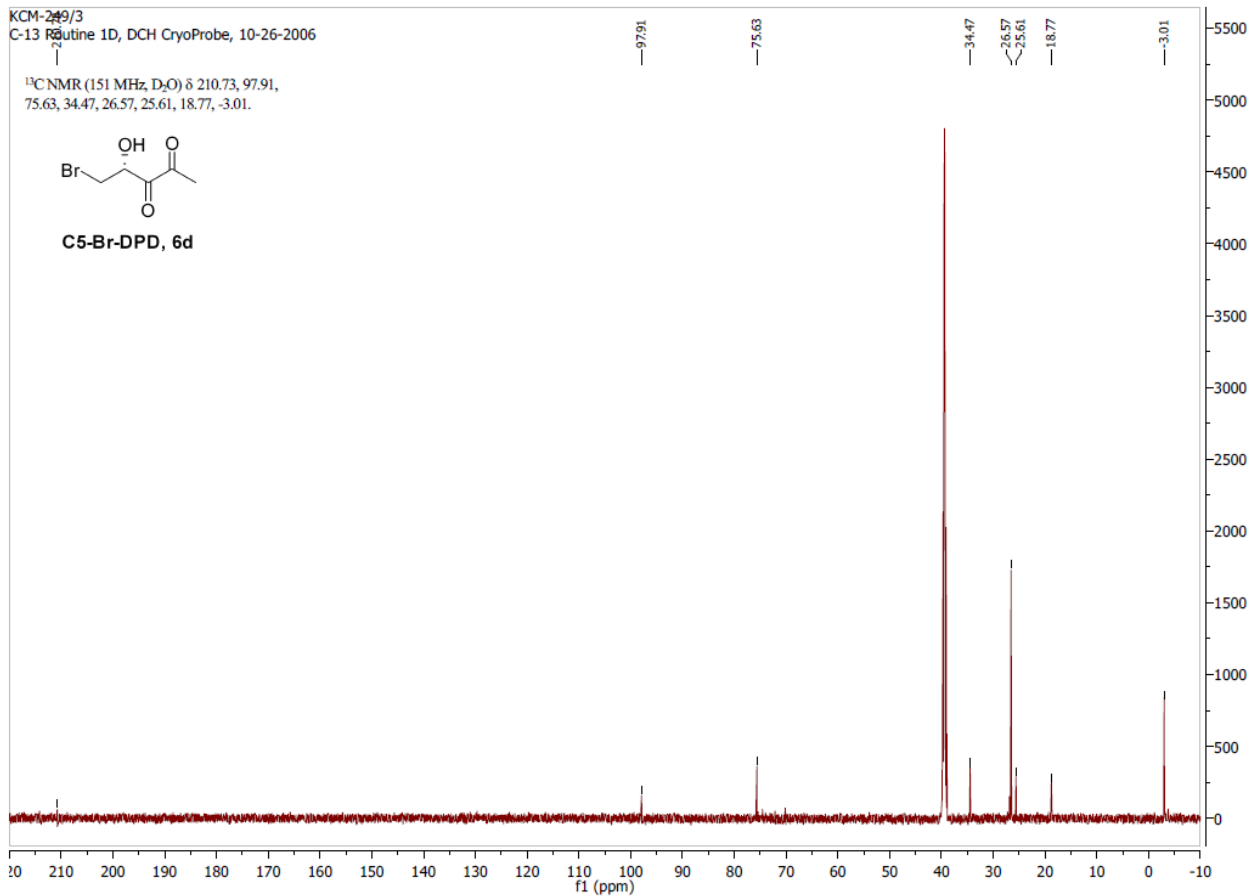

## References

1. Gómez-Bombarelli, R.; González-Pérez, M.; Pérez-Prior, M. T.; Calle, E.; Casado, J. J. *Phys. Chem. A* **2009**, *113*, 11423-11428.
2. Globisch, D.; Lowery, C. A.; McCague, K. C.; Janda, K. D. *Angew. Chem. Int. Ed.* **2012**, *51*, 4204-4208.
3. Guthrie, J. P. *J. Am. Chem. Soc.* **2000**, *122*, 5529-5538.
